# Supplementary material for: HDBR Expression: A Unique Resource for Global and Individual Gene Expression Studies during Early Human Brain Development
Source: PubMed Central journal article supplement (PMC5080337; doi:10.3389/fnana.2016.00086), 2016-10-26
Supplement: Table1.pdf [file Table1.pdf]

**Supplementary Table 1 Details of tissues used for RNAseq**

|  |                                                                        |
|--|------------------------------------------------------------------------|
|  | RNAseq data from these samples, RNA and DNA available                  |
|  | RNAseq and SNP genotype data from these samples, RNA and DNA available |
|  | RNAseq data from these samples, RNA only available                     |

| HDBR embryo or fetus # | Developmental Stage of embryo or fetus | Tissue Sample ID number | tissue morphology of sample | left or right | Karyotype | time sample in transit (minutes) |
|------------------------|----------------------------------------|-------------------------|-----------------------------|---------------|-----------|----------------------------------|
| 1406                   | CS 23                                  | HDBR251                 | telencephalon               | left          | 46, XX    | 240                              |
| 1406                   | CS 23                                  | HDBR252                 | midbrain                    |               | 46, XX    | 240                              |
| 1406                   | CS 23                                  | HDBR253                 | telencephalon               | right         | 46, XX    | 240                              |
| 1406                   | CS 23                                  | HDBR254                 | diencephalon                |               | 46, XX    | 240                              |
| 11823                  | CS 23                                  | HDBR255                 | midbrain                    |               | 46, XY    | 120                              |
| 11823                  | CS 23                                  | HDBR256                 | telencephalon               | right         | 46, XY    | 120                              |
| 11823                  | CS 23                                  | HDBR257                 | medulla oblongata           |               | 46, XY    | 120                              |
| 11823                  | CS 23                                  | HDBR258                 | choroid plexus              | left          | 46, XY    | 120                              |
| 11823                  | CS 23                                  | HDBR259                 | telencephalon               | left          | 46, XY    | 120                              |
| 11823                  | CS 23                                  | HDBR260                 | brain fragment              | left          | 46, XY    | 120                              |
| 11823                  | CS 23                                  | HDBR261                 | choroid plexus              | right         | 46, XY    | 120                              |
| 11823                  | CS 23                                  | HDBR262                 | brain fragment              | right         | 46, XY    | 120                              |
| 11823                  | CS 23                                  | HDBR263                 | diencephalon                | left          | 46, XY    | 120                              |
| 11823                  | CS 23                                  | HDBR264                 | diencephalon                | right         | 46, XY    | 120                              |
| 11826                  | CS 23                                  | HDBR265                 | cortex                      | left          | 46, XX    | 120                              |
| 11826                  | CS 23                                  | HDBR266                 | midbrain                    |               | 46, XX    | 120                              |
| 11826                  | CS 23                                  | HDBR267                 | medulla oblongata           |               | 46, XX    | 120                              |
| 11826                  | CS 23                                  | HDBR268                 | diencephalon                | left          | 46, XX    | 120                              |
| 11826                  | CS 23                                  | HDBR269                 | diencephalon                | right         | 46, XX    | 120                              |
| 11826                  | CS 23                                  | HDBR270                 | choroid plexus              |               | 46, XX    | 120                              |
| 11826                  | CS 23                                  | HDBR272                 | basal ganglia               | right         | 46, XX    | 120                              |
| 11826                  | CS 23                                  | HDBR273                 | cortex                      | right         | 46, XX    | 120                              |
| 11826                  | CS 23                                  | HDBR274                 | brain fragment              |               | 46, XX    | 120                              |
| 11827                  | CS 23                                  | HDBR275                 | cortex                      | right         | 46, XX    | 120                              |
| 11827                  | CS 23                                  | HDBR276                 | midbrain                    |               | 46, XX    | 120                              |
| 11827                  | CS 23                                  | HDBR277                 | medulla oblongata           |               | 46, XX    | 120                              |
| 11827                  | CS 23                                  | HDBR278                 | diencephalon                | left          | 46, XX    | 120                              |
| 11827                  | CS 23                                  | HDBR279                 | diencephalon                | right         | 46, XX    | 120                              |
| 11827                  | CS 23                                  | HDBR280                 | choroid plexus              | right         | 46, XX    | 120                              |
| 11827                  | CS 23                                  | HDBR281                 | basal ganglia               | left          | 46, XX    | 120                              |
| 11827                  | CS 23                                  | HDBR282                 | basal ganglia               | right         | 46, XX    | 120                              |

|       |       |         |                              |       |        |         |
|-------|-------|---------|------------------------------|-------|--------|---------|
| 11827 | CS 23 | HDBR283 | cortex                       | left  | 46, XX | 120     |
| 11827 | CS 23 | HDBR284 | brain fragment               |       | 46, XX | 120     |
| 11846 | CS 23 | HDBR285 | cortex                       | left  | 46, XX | 1800    |
| 11846 | CS 23 | HDBR286 | midbrain                     |       | 46, XX | 1800    |
| 11846 | CS 23 | HDBR287 | medulla oblongata            |       | 46, XX | 1800    |
| 11846 | CS 23 | HDBR288 | cortex                       | right | 46, XX | 1800    |
| 11846 | CS 23 | HDBR289 | diencephalon                 | left  | 46, XX | 1800    |
| 11846 | CS 23 | HDBR290 | diencephalon                 | right | 46, XX | 1800    |
| 11846 | CS 23 | HDBR291 | basal ganglia                | left  | 46, XX | 1800    |
| 11846 | CS 23 | HDBR292 | basal ganglia                | right | 46, XX | 1800    |
| 11846 | CS 23 | HDBR293 | choroid plexus               | left  | 46, XX | 1800    |
| 11846 | CS 23 | HDBR294 | choroid plexus               | right | 46, XX | 1800    |
| 11848 | CS 23 | HDBR295 | forebrain                    | right | 46, XY | 120     |
| 11848 | CS 23 | HDBR296 | hindbrain                    | left  | 46, XY | 120     |
| 11848 | CS 23 | HDBR297 | midbrain                     | right | 46, XY | 120     |
| 11848 | CS 23 | HDBR298 | forebrain                    | left  | 46, XY | 120     |
| 11848 | CS 23 | HDBR299 | midbrain                     | left  | 46, XY | 120     |
| 11884 | CS 23 | HDBR300 | medulla oblongata            |       | 46, XX | 230     |
| 11884 | CS 23 | HDBR301 | telencephalon                | left  | 46, XX | 230     |
| 11884 | CS 23 | HDBR302 | midbrain                     |       | 46, XX | 230     |
| 11884 | CS 23 | HDBR303 | telencephalon                | right | 46, XX | 230     |
| 11884 | CS 23 | HDBR304 | diencephalon                 |       | 46, XX | 230     |
| 11918 | CS 23 | HDBR305 | medulla oblongata            |       | 46, XX | 120     |
| 11918 | CS 23 | HDBR306 | midbrain                     |       | 46, XX | 120     |
| 11918 | CS 23 | HDBR307 | choroid plexus               | left  | 46, XX | 120     |
| 11918 | CS 23 | HDBR308 | cortex                       | left  | 46, XX | 120     |
| 11918 | CS 23 | HDBR309 | basal ganglia                | left  | 46, XX | 120     |
| 11918 | CS 23 | HDBR310 | basal ganglia                | right | 46, XX | 120     |
| 11918 | CS 23 | HDBR311 | cortex                       | right | 46, XX | 120     |
| 11918 | CS 23 | HDBR312 | choroid plexus               | right | 46, XX | 120     |
| 11918 | CS 23 | HDBR313 | diencephalon                 |       | 46, XX | 120     |
| 11860 | CS 23 | HDBR314 | brain fragment               |       | 46, XX | 120     |
| 11843 | CS 23 | HDBR315 | brain fragment               |       | 46, XX | 120     |
| 11824 | CS 23 | HDBR316 | hindbrain                    |       | 46, XY | 120     |
| 11444 | CS 23 | HDBR317 | brain fragment               |       | 46, XY | 120     |
| 11814 | CS 22 | HDBR319 | telencephalon                | right | 46, XY | UNKNOWN |
| 11814 | CS 22 | HDBR320 | midbrain                     | right | 46, XY | UNKNOWN |
| 11814 | CS 22 | HDBR321 | hindbrain without cerebellum | right | 46, XY | UNKNOWN |
| 11814 | CS 22 | HDBR323 | diencephalon and pituitary   | right | 46, XY | UNKNOWN |
| 11814 | CS 22 | HDBR324 | spinal cord                  | right | 46, XY | UNKNOWN |
| 11815 | CS 22 | HDBR325 | forebrain                    |       | 46, XX | UNKNOWN |

|       |       |         |                              |       |        |         |
|-------|-------|---------|------------------------------|-------|--------|---------|
| 11815 | CS 22 | HDBR326 | midbrain                     |       | 46, XX | UNKNOWN |
| 11815 | CS 22 | HDBR327 | hindbrain without cerebellum |       | 46, XX | UNKNOWN |
| 11820 | 9 pcw | HDBR328 | cortex slice 1 of 4          | right | 46, XX | UNKNOWN |
| 11820 | 9 pcw | HDBR329 | temporal lobe slice 1 of 2   | right | 46, XX | UNKNOWN |
| 11820 | 9 pcw | HDBR330 | hindbrain                    | right | 46, XX | UNKNOWN |
| 11820 | 9 pcw | HDBR331 | choroid plexus               | left  | 46, XX | UNKNOWN |
| 11820 | 9 pcw | HDBR332 | cortex slice 1 of 4          | left  | 46, XX | UNKNOWN |
| 11820 | 9 pcw | HDBR333 | cortex slice 4 of 4          | right | 46, XX | UNKNOWN |
| 11820 | 9 pcw | HDBR334 | choroid plexus               | right | 46, XX | UNKNOWN |
| 11820 | 9 pcw | HDBR335 | cortex slice 3 of 4          | left  | 46, XX | UNKNOWN |
| 11820 | 9 pcw | HDBR336 | cortex slice 4 of 4          | left  | 46, XX | UNKNOWN |
| 11820 | 9 pcw | HDBR337 | temporal lobe                | left  | 46, XX | UNKNOWN |
| 11820 | 9 pcw | HDBR338 | midbrain                     | right | 46, XX | UNKNOWN |
| 11820 | 9 pcw | HDBR339 | diencephalon                 |       | 46, XX | UNKNOWN |
| 11828 | CS 22 | HDBR340 | medulla oblongata            |       | 46, XX | UNKNOWN |
| 11828 | CS 22 | HDBR341 | telencephalon                | left  | 46, XX | UNKNOWN |
| 11828 | CS 22 | HDBR342 | midbrain                     |       | 46, XX | UNKNOWN |
| 11828 | CS 22 | HDBR343 | telencephalon                | right | 46, XX | UNKNOWN |
| 11829 | CS 22 | HDBR344 | midbrain                     |       | 46, XY | 180     |
| 11829 | CS 22 | HDBR345 | telencephalon                | right | 46, XY | 180     |
| 11829 | CS 22 | HDBR346 | medulla oblongata            |       | 46, XY | 180     |
| 11829 | CS 22 | HDBR347 | telencephalon                | left  | 46, XY | 180     |
| 11831 | CS 22 | HDBR348 | cortex                       | left  | 46, XY | UNKNOWN |
| 11831 | CS 22 | HDBR349 | medulla oblongata            |       | 46, XY | UNKNOWN |
| 11831 | CS 22 | HDBR350 | midbrain                     |       | 46, XY | UNKNOWN |
| 11831 | CS 22 | HDBR351 | diencephalon                 | left  | 46, XY | UNKNOWN |
| 11831 | CS 22 | HDBR352 | cortex                       | right | 46, XY | UNKNOWN |
| 11831 | CS 22 | HDBR353 | basal ganglia                | left  | 46, XY | UNKNOWN |
| 11831 | CS 22 | HDBR354 | choroid plexus               | left  | 46, XY | UNKNOWN |
| 11831 | CS 22 | HDBR355 | choroid plexus               | right | 46, XY | UNKNOWN |
| 11831 | CS 22 | HDBR356 | diencephalon                 | right | 46, XY | UNKNOWN |
| 11831 | CS 22 | HDBR357 | basal ganglia                | right | 46, XY | UNKNOWN |
| 11858 | CS 22 | HDBR358 | cortex                       |       | 46, XY | 120     |
| 11858 | CS 22 | HDBR359 | midbrain                     |       | 46, XY | 120     |
| 11858 | CS 22 | HDBR360 | medulla oblongata            |       | 46, XY | 120     |
| 11865 | CS 22 | HDBR361 | midbrain                     |       | 46, XY | UNKNOWN |
| 11865 | CS 22 | HDBR362 | telencephalon                | right | 46, XY | UNKNOWN |
| 11871 | CS 22 | HDBR364 | telencephalon                | left  | 46, XX | 240     |
| 11871 | CS 22 | HDBR365 | telencephalon                | right | 46, XX | 240     |

|       |        |         |                            |       |         |         |
|-------|--------|---------|----------------------------|-------|---------|---------|
| 11871 | CS 22  | HDBR366 | forebrain fragment         | left  | 46, XX  | 240     |
| 11871 | CS 22  | HDBR367 | choroid plexus             |       | 46, XX  | 240     |
| 11871 | CS 22  | HDBR368 | medulla oblongata          |       | 46, XX  | 240     |
| 11878 | CS 22  | HDBR369 | telencephalon              | right | 46, XX  | UNKNOWN |
| 11878 | CS 22  | HDBR370 | midbrain                   |       | 46, XX  | UNKNOWN |
| 11878 | CS 22  | HDBR371 | medulla oblongata          | right | 46, XX  | UNKNOWN |
| 11878 | CS 22  | HDBR372 | diencephalon               |       | 46, XX  | UNKNOWN |
| 11878 | CS 22  | HDBR373 | telencephalon              | left  | 46, XX  | UNKNOWN |
| 11868 | CS 22  | HDBR374 | brain fragment             |       | 46, XX  | 120     |
| 11793 | CS 22  | HDBR375 | brain fragment             |       | 46, XY  | 120     |
| 11443 | CS 22  | HDBR376 | brain fragment             |       | 46, XX  | 120     |
| 11410 | CS 22  | HDBR377 | brain fragment             |       | 46, XY  | 120     |
| 11882 | CS 21  | HDBR378 | forebrain- frontal         |       | 46, XX  | 120     |
| 11882 | CS 21  | HDBR379 | hindbrain                  |       | 46, XX  | 120     |
| 11849 | CS 21  | HDBR380 | brain fragment             |       | 46, XY  | 120     |
| 11811 | CS 21  | HDBR381 | brain fragment             |       | 46, XX  | 120     |
| 11856 | CS 19  | HDBR382 | hindbrain                  |       | 46, XY  | 120     |
| 11566 | CS 19  | HDBR383 | brain fragment             |       | 46, XX  | 120     |
| 11514 | CS 19  | HDBR384 | brain fragment             |       | 46, XX  | 120     |
| 11904 | CS 18  | HDBR387 | forebrain                  |       | 46, XY  | UNKNOWN |
| 11904 | CS 18  | HDBR388 | midbrain                   |       | 46, XY  | UNKNOWN |
| 11770 | CS 18  | HDBR389 | brain fragment             |       | 46, XX  | 120     |
| 11627 | CS 18  | HDBR390 | brain fragment             |       | 46, XX  | 120     |
| 11456 | CS 18  | HDBR391 | brain fragment             |       | 46, XX  | 120     |
| 11931 | CS 17  | HDBR392 | forebrain                  |       | UNKNOWN | UNKNOWN |
| 11931 | CS 17  | HDBR393 | midbrain                   |       | UNKNOWN | UNKNOWN |
| 11931 | CS 17  | HDBR394 | hindbrain                  |       | UNKNOWN | UNKNOWN |
| 11947 | 16 pcw | HDBR395 | telencephalon              | right | 46, XX  | 500     |
| 11840 | CS 14  | HDBR396 | forebrain                  |       | 46, XX  | 120     |
| 11840 | CS 14  | HDBR397 | midbrain                   |       | 46, XX  | 120     |
| 11840 | CS 14  | HDBR398 | spinal cord                |       | 46, XX  | 120     |
| 11837 | CS 14  | HDBR399 | forebrain                  |       | 46, XY  | 180     |
| 11837 | CS 14  | HDBR400 | midbrain                   |       | 46, XY  | 180     |
| 11903 | CS 13  | HDBR401 | forebrain                  |       | 46, XX  | 315     |
| 11810 | 9 pcw  | HDBR402 | forebrain                  |       | 46, XX  | 120     |
| 11810 | 9 pcw  | HDBR403 | midbrain                   |       | 46, XX  | 120     |
| 11810 | 9 pcw  | HDBR404 | spinal cord                |       | 46, XX  | 120     |
| 11845 | 9 pcw  | HDBR405 | cortex slice 1 of 5        | left  | 46, XY  | 120     |
| 11845 | 9 pcw  | HDBR406 | cortex slice 5 of 5        | left  | 46, XY  | 120     |
| 11845 | 9 pcw  | HDBR407 | temporal lobe slice 1 of 2 | left  | 46, XY  | 120     |
| 11845 | 9 pcw  | HDBR408 | medulla oblongata          |       | 46, XY  | 120     |

|       |       |         |                               |       |        |      |
|-------|-------|---------|-------------------------------|-------|--------|------|
| 11845 | 9 pcw | HDBR409 | midbrain                      |       | 46, XY | 120  |
| 11845 | 9 pcw | HDBR410 | diencephalon                  | left  | 46, XY | 120  |
| 11845 | 9 pcw | HDBR411 | temporal lobe slice<br>2 of 2 | left  | 46, XY | 120  |
| 11845 | 9 pcw | HDBR412 | diencephalon                  | left  | 46, XY | 120  |
| 11845 | 9 pcw | HDBR413 | choroid plexus                | left  | 46, XY | 120  |
| 11845 | 9 pcw | HDBR414 | cortex slice 3 of 5           | left  | 46, XY | 120  |
| 11845 | 9 pcw | HDBR415 | cortex slice 4 of 5           | left  | 46, XY | 120  |
| 11845 | 9 pcw | HDBR416 | diencephalon                  | right | 46, XY | 120  |
| 11845 | 9 pcw | HDBR417 | temporal lobe slice<br>1 of 2 | right | 46, XY | 120  |
| 11845 | 9 pcw | HDBR418 | temporal lobe slice<br>2 of 2 | right | 46, XY | 120  |
| 11845 | 9 pcw | HDBR419 | basal ganglia                 | right | 46, XY | 120  |
| 11845 | 9 pcw | HDBR420 | choroid plexus                | right | 46, XY | 120  |
| 11845 | 9 pcw | HDBR421 | cortex slice 1 of 5           | right | 46, XY | 120  |
| 11845 | 9 pcw | HDBR422 | cortex slice 5 of 5           | right | 46, XY | 120  |
| 11851 | 9 pcw | HDBR423 | cortex                        | right | 46, XX | 240  |
| 11851 | 9 pcw | HDBR424 | cortex                        | right | 46, XX | 240  |
| 11851 | 9 pcw | HDBR425 | temporal lobe slice<br>1 of 2 | right | 46, XX | 240  |
| 11851 | 9 pcw | HDBR426 | medulla oblongata             |       | 46, XX | 240  |
| 11851 | 9 pcw | HDBR427 | midbrain                      |       | 46, XX | 240  |
| 11851 | 9 pcw | HDBR431 | temporal lobe slice<br>2 of 2 | left  | 46, XX | 240  |
| 11851 | 9 pcw | HDBR432 | choroid plexus                |       | 46, XX | 240  |
| 11851 | 9 pcw | HDBR433 | basal ganglia                 | left  | 46, XX | 240  |
| 11851 | 9 pcw | HDBR434 | cortex                        | left  | 46, XX | 240  |
| 11851 | 9 pcw | HDBR435 | cortex                        | left  | 46, XX | 240  |
| 11851 | 9 pcw | HDBR436 | temporal lobe slice<br>2 of 2 | right | 46, XX | 240  |
| 11851 | 9 pcw | HDBR437 | basal ganglia                 | right | 46, XX | 240  |
| 11851 | 9 pcw | HDBR438 | cortex                        | right | 46, XX | 240  |
| 11851 | 9 pcw | HDBR439 | cortex                        | right | 46, XX | 240  |
| 11851 | 9 pcw | HDBR440 | cortex                        | right | 46, XX | 240  |
| 11873 | 9 pcw | HDBR441 | cortex slice 1 of 5           | right | 46, XX | 1080 |
| 11873 | 9 pcw | HDBR442 | cortex slice 5 of 5           | right | 46, XX | 1080 |
| 11873 | 9 pcw | HDBR443 | temporal lobe slice<br>1 of 2 | right | 46, XX | 1080 |
| 11873 | 9 pcw | HDBR444 | medulla oblongata             |       | 46, XX | 1080 |
| 11873 | 9 pcw | HDBR445 | pons                          |       | 46, XX | 1080 |
| 11873 | 9 pcw | HDBR446 | midbrain                      |       | 46, XX | 1080 |
| 11873 | 9 pcw | HDBR447 | diencephalon                  | left  | 46, XX | 1080 |
| 11873 | 9 pcw | HDBR449 | basal ganglia                 | left  | 46, XX | 1080 |

|       |            |         |                               |       |         |         |
|-------|------------|---------|-------------------------------|-------|---------|---------|
| 11873 | 9 pcw      | HDBR450 | cortex slice 1 of 5           | left  | 46, XX  | 1080    |
| 11873 | 9 pcw      | HDBR451 | cortex slice 3 of 5           | left  | 46, XX  | 1080    |
| 11873 | 9 pcw      | HDBR452 | cortex slice 4 of 5           | left  | 46, XX  | 1080    |
| 11873 | 9 pcw      | HDBR453 | cortex slice 5 of 5           | left  | 46, XX  | 1080    |
| 11873 | 9 pcw      | HDBR454 | temporal lobe slice<br>2 of 2 | right | 46, XX  | 1080    |
| 11873 | 9 pcw      | HDBR455 | diencephalon                  | right | 46, XX  | 1080    |
| 11873 | 9 pcw      | HDBR456 | choroid plexus                | right | 46, XX  | 1080    |
| 11873 | 9 pcw      | HDBR457 | basal ganglia                 | right | 46, XX  | 1080    |
| 11606 | 9 pcw      | HDBR458 | forebrain                     | left  | 46, XY  | UNKNOWN |
| 11606 | 9 pcw      | HDBR459 | forebrain                     | right | 46, XY  | UNKNOWN |
| 11606 | 9 pcw      | HDBR460 | midbrain                      |       | 46, XY  | UNKNOWN |
| 11912 | 9 pcw      | HDBR461 | telencephalon                 | right | 46, XY  | 120     |
| 11912 | 9 pcw      | HDBR462 | telencephalon                 | left  | 46, XY  | 120     |
| 11912 | 9 pcw      | HDBR463 | midbrain                      |       | 46, XY  | 120     |
| 11912 | 9 pcw      | HDBR464 | medulla oblongata             |       | 46, XY  | 120     |
| 11874 | 9 pcw      | HDBR465 | forebrain<br>fragment         |       | 46, XY  | 120     |
| 11874 | 9 pcw      | HDBR466 | midbrain                      |       | 46, XY  | 120     |
| 11881 | 9 pcw      | HDBR468 | hindbrain                     |       | 46, XY  | 120     |
| 11626 | 9 pcw      | HDBR469 | forebrain<br>fragment         |       | 46, XX  | 120     |
| 11832 | Late 8 pcw | HDBR470 | cortex                        | right | 46, XX  | 180     |
| 11832 | Late 8 pcw | HDBR471 | midbrain                      |       | 46, XX  | 180     |
| 11832 | Late 8 pcw | HDBR472 | medulla oblongata             |       | 46, XX  | 180     |
| 11832 | Late 8 pcw | HDBR474 | diencephalon                  | left  | 46, XX  | 180     |
| 11832 | Late 8 pcw | HDBR475 | cortex                        | left  | 46, XX  | 180     |
| 11832 | Late 8 pcw | HDBR476 | basal ganglia                 | left  | 46, XX  | 180     |
| 11832 | Late 8 pcw | HDBR478 | diencephalon                  | right | 46, XX  | 180     |
| 11832 | Late 8 pcw | HDBR479 | basal ganglia                 | right | 46, XX  | 180     |
| 11830 | Late 8 pcw | HDBR480 | cortex                        | left  | 46, XX  | UNKNOWN |
| 11830 | Late 8 pcw | HDBR481 | midbrain                      |       | 46, XX  | UNKNOWN |
| 11830 | Late 8 pcw | HDBR482 | medulla oblongata             |       | 46, XX  | UNKNOWN |
| 11830 | Late 8 pcw | HDBR484 | diencephalon                  | left  | 46, XX  | UNKNOWN |
| 11830 | Late 8 pcw | HDBR485 | diencephalon                  | right | 46, XX  | UNKNOWN |
| 11830 | Late 8 pcw | HDBR486 | basal ganglia                 | left  | 46, XX  | UNKNOWN |
| 11830 | Late 8 pcw | HDBR487 | basal ganglia                 | right | 46, XX  | UNKNOWN |
| 11869 | Late 8 pcw | HDBR488 | midbrain                      |       | 46, XX  | 120     |
| 11869 | Late 8 pcw | HDBR489 | hindbrain                     |       | 46, XX  | 120     |
| 11800 | Late 8 pcw | HDBR490 | brain fragment                |       | 46, XX  | 120     |
| 11492 | Late 8 pcw | HDBR491 | brain fragment                |       | 46, XY  | 120     |
| 1107  | 16 pcw     | HDBR504 | cortex slice 1 of 10          | right | UNKNOWN | 45      |



|       |        |         |                               |       |         |      |
|-------|--------|---------|-------------------------------|-------|---------|------|
| 1107  | 16 pcw | HDBR507 | cortex slice 4 of 10          | right | UNKNOWN | 45   |
| 1107  | 16 pcw | HDBR515 | cortex slice 9 of 10          | right | UNKNOWN | 45   |
| 1107  | 16 pcw | HDBR517 | cortex slice 3 of 10          | right | UNKNOWN | 45   |
| 1107  | 16 pcw | HDBR518 | cortex slice 4 of 10          | right | UNKNOWN | 45   |
| 11920 | CS 23  | HDBR519 | hindbrain                     |       | 46, XY  | 170  |
| 11920 | CS 23  | HDBR520 | midbrain                      |       | 46, XY  | 170  |
| 11920 | CS 23  | HDBR521 | basal ganglia                 | left  | 46, XY  | 170  |
| 11920 | CS 23  | HDBR522 | cortex                        | left  | 46, XY  | 170  |
| 11920 | CS 23  | HDBR523 | basal ganglia                 | right | 46, XY  | 170  |
| 11907 | 16 pcw | HDBR524 | medulla oblongata             | right | 46, XX  | 1000 |
| 11907 | 16 pcw | HDBR525 | pons                          | right | 46, XX  | 1000 |
| 11907 | 16 pcw | HDBR526 | midbrain                      | right | 46, XX  | 1000 |
| 11907 | 16 pcw | HDBR527 | temporal lobe slice<br>1 of 2 | right | 46, XX  | 1000 |
| 11907 | 16 pcw | HDBR528 | temporal lobe slice<br>2 of 2 | right | 46, XX  | 1000 |
| 11907 | 16 pcw | HDBR529 | diencephalon                  | right | 46, XX  | 1000 |
| 11907 | 16 pcw | HDBR530 | choroid plexus                | right | 46, XX  | 1000 |
| 11907 | 16 pcw | HDBR531 | basal ganglia                 | right | 46, XX  | 1000 |
| 11907 | 16 pcw | HDBR532 | cortex slice 1 of 5           | right | 46, XX  | 1000 |
| 11907 | 16 pcw | HDBR533 | cortex slice 2 of 5           | right | 46, XX  | 1000 |
| 11907 | 16 pcw | HDBR534 | cortex slice 3 of 5           | right | 46, XX  | 1000 |
| 11907 | 16 pcw | HDBR535 | cortex slice 4 of 5           | right | 46, XX  | 1000 |
| 11907 | 16 pcw | HDBR536 | cortex slice 5 of 5           | right | 46, XX  | 1000 |
| 11819 | 16 pcw | HDBR537 | brain fragment                |       | 46, XX  | 120  |
| 1117  | 15 pcw | HDBR538 | cortex slice 1 of 10          | left  | UNKNOWN | 140  |
| 1117  | 15 pcw | HDBR539 | cortex slice 10 of<br>10      | left  | UNKNOWN | 140  |
| 1117  | 15 pcw | HDBR540 | temporal lobe                 | left  | UNKNOWN | 140  |
| 1117  | 15 pcw | HDBR541 | cortex slice 3 of 10          | left  | UNKNOWN | 140  |
| 1117  | 15 pcw | HDBR542 | cortex slice 4 of 10          | left  | UNKNOWN | 140  |
| 1117  | 15 pcw | HDBR543 | cortex slice 5 of 10          | left  | UNKNOWN | 140  |
| 1117  | 15 pcw | HDBR544 | cortex slice 6 of 10          | left  | UNKNOWN | 140  |
| 1117  | 15 pcw | HDBR545 | cortex slice 7 of 10          | left  | UNKNOWN | 140  |

|       |        |         |                              |       |         |         |
|-------|--------|---------|------------------------------|-------|---------|---------|
| 1117  | 15 pcw | HDBR546 | cortex slice 9 of 10         | left  | UNKNOWN | 140     |
| 1290  | 14 pcw | HDBR547 | telencephalon                | left  | 46, XY  | 1090    |
| 11900 | 14 pcw | HDBR548 | hindbrain                    | left  | 46, XY  | 1020    |
| 11900 | 14 pcw | HDBR549 | hindbrain                    | right | 46, XY  | 1020    |
| 11900 | 14 pcw | HDBR550 | diencephalon and midbrain    |       | 46, XY  | 1020    |
| 11900 | 14 pcw | HDBR551 | temporal lobe                | right | 46, XY  | 1020    |
| 11900 | 14 pcw | HDBR552 | temporal lobe                |       | 46, XY  | 1020    |
| 11900 | 14 pcw | HDBR553 | cortex slice 5 of 5          |       | 46, XY  | 1020    |
| 11900 | 14 pcw | HDBR554 | cortex slice 4 of 5          |       | 46, XY  | 1020    |
| 11900 | 14 pcw | HDBR555 | cortex slice 2 of 5          |       | 46, XY  | 1020    |
| 11900 | 14 pcw | HDBR556 | cortex slice 1 of 5          |       | 46, XY  | 1020    |
| 11794 | 14 pcw | HDBR557 | brain fragment               |       | 46, XX  | 120     |
| 1923  | 13 pcw | HDBR558 | cortex slice 1 of 3          | left  | 46, XX  | 150     |
| 1923  | 13 pcw | HDBR559 | midbrain                     |       | 46, XX  | 150     |
| 1923  | 13 pcw | HDBR560 | medulla oblongata            |       | 46, XX  | 150     |
| 1923  | 13 pcw | HDBR561 | cortex slice 2 of 3          | left  | 46, XX  | 150     |
| 1923  | 13 pcw | HDBR562 | cortex slice 3 of 3          | right | 46, XX  | 150     |
| 1923  | 13 pcw | HDBR563 | cortex slice 1 of 2          | right | 46, XX  | 150     |
| 1923  | 13 pcw | HDBR564 | basal ganglia                | left  | 46, XX  | 150     |
| 1923  | 13 pcw | HDBR565 | basal ganglia                | right | 46, XX  | 150     |
| 1923  | 13 pcw | HDBR566 | diencephalon                 | left  | 46, XX  | 150     |
| 1923  | 13 pcw | HDBR567 | diencephalon                 | right | 46, XX  | 150     |
| 1923  | 13 pcw | HDBR568 | cortex slice 2 of 2          | right | 46, XX  | 150     |
| 11892 | 13 pcw | HDBR569 | cortex                       |       | 46, XY  | 120     |
| 11844 | 13 pcw | HDBR570 | forebrain fragment           | left  | 46, XY  | 120     |
| 11501 | 13 pcw | HDBR571 | brain fragment               |       | 46, XY  | 120     |
| 1835  | 12 pcw | HDBR572 | cortex slice 1 of 4          |       | 46, XY  | UNKNOWN |
| 1835  | 12 pcw | HDBR573 | cortex slice 2 of 4          |       | 46, XY  | UNKNOWN |
| 1835  | 12 pcw | HDBR574 | cortex slice 3 of 4          |       | 46, XY  | UNKNOWN |
| 1118  | 12 pcw | HDBR575 | temporal lobe slice 1 of 2   | right | UNKNOWN | 35      |
| 11854 | 12 pcw | HDBR577 | midbrain                     |       | 46, XY  | 840     |
| 11834 | 12 pcw | HDBR578 | cortex slice 1 of 3          | right | 46, XY  | 230     |
| 11834 | 12 pcw | HDBR579 | midbrain                     |       | 46, XY  | 230     |
| 11834 | 12 pcw | HDBR580 | hindbrain without cerebellum |       | 46, XY  | 230     |
| 11834 | 12 pcw | HDBR581 | temporal lobe slice 1 of 2   | left  | 46, XY  | 230     |
| 11834 | 12 pcw | HDBR582 | temporal lobe slice 2 of 2   | left  | 46, XY  | 230     |
| 11834 | 12 pcw | HDBR583 | cortex slice 1 of 5          | left  | 46, XY  | 230     |
| 11834 | 12 pcw | HDBR584 | cortex slice 5 of 5          | left  | 46, XY  | 230     |



|       |        |         |                               |       |         |         |
|-------|--------|---------|-------------------------------|-------|---------|---------|
| 11834 | 12 pcw | HDBR585 | temporal lobe slice<br>1 of 2 | right | 46, XY  | 230     |
| 11834 | 12 pcw | HDBR586 | temporal lobe slice<br>2 of 2 | right | 46, XY  | 230     |
| 11834 | 12 pcw | HDBR587 | cortex slice 2 of 3           | right | 46, XY  | 230     |
| 11834 | 12 pcw | HDBR588 | cortex slice 3 of 3           | right | 46, XY  | 230     |
| 11834 | 12 pcw | HDBR589 | cortex slice 4 of 5           | left  | 46, XY  | 230     |
| 11834 | 12 pcw | HDBR590 | choroid plexus                | right | 46, XY  | 230     |
| 11834 | 12 pcw | HDBR591 | cortex slice 5 of 5           | left  | 46, XY  | 230     |
| 11834 | 12 pcw | HDBR592 | choroid plexus                | left  | 46, XY  | 230     |
| 11834 | 12 pcw | HDBR593 | diencephalon and<br>pituitary |       | 46, XY  | 230     |
| 1102  | 12 pcw | HDBR594 | forebrain                     | left  | 46, XX  | 200     |
| 1102  | 12 pcw | HDBR595 | hindbrain<br>fragmenet        |       | 46, XX  | 200     |
| 1558  | 12 pcw | HDBR596 | forebrain                     | left  | 46, XX  | 180     |
| 1558  | 12 pcw | HDBR597 | forebrain                     | right | 46, XX  | 180     |
| 1558  | 12 pcw | HDBR598 | midbrain                      |       | 46, XX  | 180     |
| 11885 | 12 pcw | HDBR599 | cortex slice 1 of 5           | left  | 46, XY  | UNKNOWN |
| 11885 | 12 pcw | HDBR600 | cortex slice 5 of 5           | left  | 46, XY  | UNKNOWN |
| 11885 | 12 pcw | HDBR601 | temporal lobe slice<br>2 of 2 | left  | 46, XY  | UNKNOWN |
| 11885 | 12 pcw | HDBR602 | cortex slice 1 of 5           | right | 46, XY  | UNKNOWN |
| 11885 | 12 pcw | HDBR603 | cortex slice 5 of 5           | right | 46, XY  | UNKNOWN |
| 11885 | 12 pcw | HDBR604 | temporal lobe                 | right | 46, XY  | UNKNOWN |
| 11885 | 12 pcw | HDBR605 | midbrain                      |       | 46, XY  | UNKNOWN |
| 11885 | 12 pcw | HDBR606 | hindbrain                     |       | 46, XY  | UNKNOWN |
| 11885 | 12 pcw | HDBR607 | temporal lobe slice<br>1 of 2 | left  | 46, XY  | UNKNOWN |
| 11885 | 12 pcw | HDBR608 | cortex slice 2 of 5           | right | 46, XY  | UNKNOWN |
| 11885 | 12 pcw | HDBR609 | cortex slice 3 of 5           | right | 46, XY  | UNKNOWN |
| 11885 | 12 pcw | HDBR610 | cortex slice 4 of 5           | right | 46, XY  | UNKNOWN |
| 11885 | 12 pcw | HDBR611 | temporal lobe slice<br>1 of 2 | right | 46, XY  | UNKNOWN |
| 11885 | 12 pcw | HDBR612 | diencephalon                  |       | 46, XY  | UNKNOWN |
| 1047  | 12 pcw | HDBR613 | brain fragment                |       | 46, XX  | 150     |
| 11429 | 12 pcw | HDBR614 | brain fragment                |       | 46, XX  | 120     |
| 11602 | 11 pcw | HDBR615 | forebrain                     | left  | 46, XY  | UNKNOWN |
| 11602 | 11 pcw | HDBR616 | forebrain                     | right | 46, XY  | UNKNOWN |
| 11798 | 11 pcw | HDBR618 | brain fragment                |       | 46, XY  | 120     |
| 1110  | 11 pcw | HDBR619 | temporal lobe                 | right | UNKNOWN | 30      |
| 1123  | 11 pcw | HDBR620 | telencephalon<br>slice 1 of 6 | left  | UNKNOWN | 45      |
| 1123  | 11 pcw | HDBR621 | telencephalon<br>slice 3 of 6 | left  | UNKNOWN | 45      |

|       |        |         |                            |       |         |         |
|-------|--------|---------|----------------------------|-------|---------|---------|
| 1123  | 11 pcw | HDBR622 | telencephalon slice 6 of 6 | left  | UNKNOWN | 45      |
| 1123  | 11 pcw | HDBR623 | telencephalon slice 2 of 6 | left  | UNKNOWN | 45      |
| 1123  | 11 pcw | HDBR624 | telencephalon slice 4 of 6 | left  | UNKNOWN | 45      |
| 1123  | 11 pcw | HDBR625 | telencephalon slice 5 of 6 | left  | UNKNOWN | 45      |
| 11656 | 11 pcw | HDBR626 | cortex                     | left  | 46, XX  | UNKNOWN |
| 11656 | 11 pcw | HDBR628 | midbrain                   |       | 46, XX  | UNKNOWN |
| 11656 | 11 pcw | HDBR629 | basal ganglia              |       | 46, XX  | UNKNOWN |
| 11609 | 11 pcw | HDBR630 | telencephalon              | right | 46, XX  | UNKNOWN |
| 11609 | 11 pcw | HDBR632 | midbrain                   |       | 46, XX  | UNKNOWN |
| 11833 | 11 pcw | HDBR633 | diencephalon               | left  | 46, XX  | 1800    |
| 11833 | 11 pcw | HDBR634 | midbrain                   |       | 46, XX  | 1800    |
| 11833 | 11 pcw | HDBR635 | medulla oblongata          |       | 46, XX  | 1800    |
| 11833 | 11 pcw | HDBR638 | choroid plexus             | left  | 46, XX  | 1800    |
| 11833 | 11 pcw | HDBR640 | basal ganglia              | left  | 46, XX  | 1800    |
| 11833 | 11 pcw | HDBR641 | choroid plexus             | right | 46, XX  | 1800    |
| 11833 | 11 pcw | HDBR642 | diencephalon               | right | 46, XX  | 1800    |
| 11833 | 11 pcw | HDBR643 | temporal lobe              | right | 46, XX  | 1800    |
| 11833 | 11 pcw | HDBR644 | basal ganglia              | right | 46, XX  | 1800    |
| 11833 | 11 pcw | HDBR645 | cortex slice 1 of 5        | right | 46, XX  | 1800    |
| 11833 | 11 pcw | HDBR646 | cortex slice 2 of 5        | right | 46, XX  | 1800    |
| 11833 | 11 pcw | HDBR647 | cortex slice 3 of 5        | right | 46, XX  | 1800    |
| 11833 | 11 pcw | HDBR648 | cortex slice 4 of 5        | right | 46, XX  | 1800    |
| 11833 | 11 pcw | HDBR649 | cortex slice 5 of 5        | right | 46, XX  | 1800    |
| 11893 | 11 pcw | HDBR650 | forebrain fragment         | left  | 46, XX  | 120     |
| 11806 | 11 pcw | HDBR651 | brain fragment             |       | 46, XX  | 120     |
| 11930 | 11 pcw | HDBR652 | cortex slice 1 of 5        | right | 46, XX  | 180     |
| 11930 | 11 pcw | HDBR653 | cortex slice 5 of 5        | right | 46, XX  | 180     |
| 11930 | 11 pcw | HDBR654 | temporal lobe slice 1 of 2 | right | 46, XX  | 180     |
| 11930 | 11 pcw | HDBR655 | diencephalon               |       | 46, XX  | 180     |
| 11930 | 11 pcw | HDBR656 | medulla oblongata          |       | 46, XX  | 180     |
| 11942 | 11 pcw | HDBR658 | diencephalon               | left  | 46, XX  | 1000    |
| 11942 | 11 pcw | HDBR659 | basal ganglia              | left  | 46, XX  | 1000    |
| 11942 | 11 pcw | HDBR660 | cortex slice 1 of 5        | left  | 46, XX  | 1000    |
| 1890  | 10 pcw | HDBR661 | diencephalon               |       | UNKNOWN | 120     |
| 1890  | 10 pcw | HDBR662 | choroid plexus             |       | UNKNOWN | 120     |
| 1281  | 10 pcw | HDBR663 | forebrain                  | left  | 46, XY  | 180     |
| 1281  | 10 pcw | HDBR664 | forebrain                  | right | 46, XY  | 180     |

|       |        |         |                            |       |        |     |
|-------|--------|---------|----------------------------|-------|--------|-----|
| 1308  | 10 pcw | HDBR665 | forebrain and midbrain     |       | 46, XX | 120 |
| 11841 | 10 pcw | HDBR668 | cortex slice 1 of 5        | right | 46, XY | 120 |
| 11841 | 10 pcw | HDBR669 | cortex slice 5 of 5        | right | 46, XY | 120 |
| 11841 | 10 pcw | HDBR670 | temporal lobe slice 1 of 2 | right | 46, XY | 120 |
| 11841 | 10 pcw | HDBR671 | midbrain                   |       | 46, XY | 120 |
| 11841 | 10 pcw | HDBR672 | medulla oblongata          |       | 46, XY | 120 |
| 11841 | 10 pcw | HDBR673 | cortex                     | left  | 46, XY | 120 |
| 11841 | 10 pcw | HDBR674 | basal ganglia              | left  | 46, XY | 120 |
| 11841 | 10 pcw | HDBR675 | diencephalon               | left  | 46, XY | 120 |
| 11841 | 10 pcw | HDBR676 | temporal lobe slice 2 of 2 | right | 46, XY | 120 |
| 11841 | 10 pcw | HDBR677 | diencephalon               | right | 46, XY | 120 |
| 11841 | 10 pcw | HDBR678 | cortex slice 2 of 5        | right | 46, XY | 120 |
| 11880 | 10 pcw | HDBR679 | brain fragment             |       | 46, XY | 120 |
| 11947 | 13 pcw | HDBR691 | temporal lobe slice 1 of 2 | right | 46, XX | 500 |
| 11947 | 13 pcw | HDBR692 | diencephalon               | right | 46, XX | 500 |
| 11947 | 13 pcw | HDBR693 | choroid plexus             | right | 46, XX | 500 |
| 11947 | 13 pcw | HDBR694 | basal ganglia              | right | 46, XX | 500 |
| 11947 | 13 pcw | HDBR695 | medulla oblongata          |       | 46, XX | 500 |
| 11921 | 17 pcw | HDBR696 | cortex slice 1 of 5        | left  | 46, XY | 220 |
| 11921 | 17 pcw | HDBR697 | cortex slice 5 of 5        | left  | 46, XY | 220 |
| 11921 | 17 pcw | HDBR698 | temporal lobe slice 1 of 2 | left  | 46, XY | 220 |
| 11921 | 17 pcw | HDBR699 | basal ganglia              | left  | 46, XY | 220 |
| 11921 | 17 pcw | HDBR700 | cortex slice 2 of 5        | left  | 46, XY | 220 |
| 11122 | CS 18  | HDBR701 | brain fragment             |       | 46, XX | 120 |
| 11238 | CS 19  | HDBR702 | brain fragment             |       | 46, XX | 120 |
| 11286 | CS 19  | HDBR703 | brain fragment             |       | 46, XY | 120 |
| 11284 | CS 19  | HDBR704 | spinal cord                |       | 46, XX | 120 |
| 11287 | CS 20  | HDBR705 | hindbrain                  |       | 46, XY | 120 |
| 11237 | CS 20  | HDBR706 | brain fragment             |       | 46, XY | 120 |
| 11382 | CS 20  | HDBR707 | brain fragment             |       | 46, XY | 120 |
| 11254 | CS 21  | HDBR708 | brain fragment             |       | 46, XY | 120 |
| 11471 | CS 21  | HDBR709 | brain fragment             |       | 46, XY | 120 |
| 11811 | CS 21  | HDBR710 | spinal cord                |       | 46, XX | 120 |
| 11849 | CS21   | HDBR711 | spinal cord                |       | 46, XY | 120 |
| 11875 | 19 pcw | HDBR712 | brain fragment             |       | 46, XY | 120 |
| 11882 | CS 21  | HDBR713 | midbrain                   |       | 46, XX | 120 |
| 11304 | CS 21  | HDBR714 | brain fragment             |       | 46, XX | 120 |
| 11165 | CS 21  | HDBR715 | brain fragment             |       | 46, XX | 120 |
| 11501 | 13 pcw | HDBR716 | spinal cord                |       | 46, XY | 120 |

|       |       |         |                |       |         |         |
|-------|-------|---------|----------------|-------|---------|---------|
| 11814 | CS 22 | HDBR717 | cerebellum     | right | 46, XY  | UNKNOWN |
| 11815 | CS 22 | HDBR718 | cerebellum     |       | 46, XX  | UNKNOWN |
| 11820 | 9 pcw | HDBR719 | cerebellum     | right | 46, XX  | UNKNOWN |
| 11828 | CS 22 | HDBR720 | cerebellum     |       | 46, XX  | UNKNOWN |
| 11829 | CS 22 | HDBR721 | cerebellum     |       | 46, XY  | 180     |
| 11831 | CS 22 | HDBR722 | cerebellum     |       | 46, XY  | UNKNOWN |
| 11858 | CS 22 | HDBR723 | cerebellum     |       | 46, XY  | 120     |
| 11865 | CS 22 | HDBR724 | cerebellum     |       | 46, XY  | UNKNOWN |
| 11871 | CS 22 | HDBR725 | cerebellum     |       | 46, XX  | 240     |
| 11878 | CS 22 | HDBR726 | cerebellum     | right | 46, XX  | UNKNOWN |
| 1707  | CS 22 | HDBR727 | brain fragment |       | 46, XX  | 120     |
| 1092  | CS 22 | HDBR728 | spinal cord    |       | 46, XX  | UNKNOWN |
| 11868 | CS 22 | HDBR729 | spinal cord    |       | 46, XX  | 120     |
| 11793 | CS 22 | HDBR730 | spinal cord    |       | 46, XY  | 120     |
| 11443 | CS 22 | HDBR731 | spinal cord    |       | 46, XX  | 120     |
| 11410 | CS 22 | HDBR732 | spinal cord    |       | 46, XY  | 120     |
| 1406  | CS 23 | HDBR733 | hindbrain      |       | 46, XX  | 240     |
| 1607  | CS 23 | HDBR734 | brain fragment |       | 46, XX  | 215     |
| 11823 | CS 23 | HDBR735 | cerebellum     |       | 46, XY  | 120     |
| 11826 | CS 23 | HDBR736 | cerebellum     |       | 46, XX  | 120     |
| 11827 | CS 23 | HDBR737 | cerebellum     |       | 46, XX  | 120     |
| 11846 | CS 23 | HDBR738 | cerebellum     |       | 46, XX  | 1800    |
| 11848 | CS 23 | HDBR739 | hindbrain      | right | 46, XY  | 120     |
| 11884 | CS 23 | HDBR740 | cerebellum     |       | 46, XX  | 230     |
| 1851  | CS 23 | HDBR741 | temporal lobe  |       | UNKNOWN | UNKNOWN |
| 2193  | CS 23 | HDBR743 | brain fragment |       | 46, XY  | 240     |
| 11918 | CS 23 | HDBR744 | cerebellum     |       | 46, XX  | 120     |
| 11860 | CS 23 | HDBR745 | spinal cord    |       | 46, XX  | 120     |
| 11843 | CS 23 | HDBR746 | spinal cord    |       | 46, XX  | 120     |
| 11824 | CS 23 | HDBR747 | spinal cord    |       | 46, XY  | 120     |
| 11444 | CS 23 | HDBR748 | spinal cord    |       | 46, XY  | 120     |
| 11402 | CS 23 | HDBR749 | spinal cord    |       | 46, XX  | 120     |
| 11120 | CS 23 | HDBR750 | brain fragment |       | 46, XY  | 120     |
| 11354 | CS 20 | HDBR751 | brain fragment |       | 46, XY  | 120     |
| 11245 | CS 20 | HDBR752 | brain fragment |       | 46, XX  | 120     |
| 11241 | CS 20 | HDBR753 | brain fragment |       | 46, XX  | 120     |
| 11156 | CS 20 | HDBR754 | brain fragment |       | 46, XY  | 120     |
| 11149 | CS 20 | HDBR755 | hindbrain      |       | 46, XX  | 120     |
| 11920 | CS 23 | HDBR756 | diencephalon   |       | 46, XY  | 170     |
| 11121 | CS 20 | HDBR757 | cortex         |       | 46, XY  | 120     |
| 11118 | CS 20 | HDBR758 | forebrain      |       | 46, XX  | 120     |
| 1039  | CS 19 | HDBR759 | spinal cord    |       | 46, XX  | UNKNOWN |
| 1319  | CS 19 | HDBR760 | hindbrain      |       | 46, XX  | 180     |
| 11894 | CS 19 | HDBR762 | brain fragment |       | 46, XY  | 120     |
| 11856 | CS 19 | HDBR763 | spinal cord    |       | 46, XY  | 120     |
| 11514 | CS 19 | HDBR765 | spinal cord    |       | 46, XX  | 120     |

|       |            |         |                |  |         |         |
|-------|------------|---------|----------------|--|---------|---------|
| 11470 | CS 19      | HDBR766 | brain fragment |  | 46, XX  | 120     |
| 11363 | CS 19      | HDBR767 | brain fragment |  | 46, XX  | 120     |
| 11323 | CS 19      | HDBR768 | brain fragment |  | 46, XX  | 120     |
| 11320 | CS 19      | HDBR769 | brain fragment |  | 46, XY  | 120     |
| 11318 | CS 19      | HDBR770 | brain fragment |  | 46, XY  | 120     |
| 11317 | CS 19      | HDBR771 | brain fragment |  | 46, XY  | 120     |
| 11300 | CS 19      | HDBR772 | brain fragment |  | 46, XY  | 120     |
| 11904 | CS 18      | HDBR774 | hindbrain      |  | 46, XY  | UNKNOWN |
| 1038  | CS 18      | HDBR775 | spinal cord    |  | 46, XY  | UNKNOWN |
| 11859 | CS 18      | HDBR776 | brain fragment |  | 46, XY  | 120     |
| 11770 | CS 18      | HDBR777 | spinal cord    |  | 46, XX  | 120     |
| 11627 | CS 18      | HDBR778 | spinal cord    |  | 46, XX  | 120     |
| 11469 | CS 18      | HDBR779 | brain fragment |  | 46, XX  | 120     |
| 11456 | CS 18      | HDBR780 | spinal cord    |  | 46, XX  | 120     |
| 11438 | CS 18      | HDBR781 | brain fragment |  | 46, XY  | 120     |
| 11322 | CS 18      | HDBR782 | brain fragment |  | 46, XY  | 120     |
| 11234 | CS 18      | HDBR784 | brain fragment |  | 46, XX  | 120     |
| 11395 | CS 17      | HDBR785 | brain fragment |  | 46, XY  | 120     |
| 11321 | CS 17      | HDBR786 | brain fragment |  | 46, XY  | 120     |
| 11931 | CS 17      | HDBR787 | spinal cord    |  | UNKNOWN | UNKNOWN |
| 11513 | CS 16      | HDBR790 | spinal cord    |  | 46, XY  | 120     |
| 11334 | CS 16      | HDBR791 | brain fragment |  | 46, XX  | 120     |
| 11397 | CS 15      | HDBR792 | brain fragment |  | 46, XX  | 120     |
| 11405 | CS 15      | HDBR793 | brain fragment |  | 46, XX  | 120     |
| 11840 | CS 14      | HDBR794 | hindbrain      |  | 46, XX  | 120     |
| 11837 | CS 14      | HDBR795 | hindbrain      |  | 46, XY  | 180     |
| 11903 | CS 13      | HDBR796 | midbrain       |  | 46, XX  | 315     |
| 11810 | 9 pcw      | HDBR797 | hindbrain      |  | 46, XX  | 120     |
| 11845 | 9 pcw      | HDBR798 | cerebellum     |  | 46, XY  | 120     |
| 11851 | 9 pcw      | HDBR799 | cerebellum     |  | 46, XX  | 240     |
| 11873 | 9 pcw      | HDBR800 | cerebellum     |  | 46, XX  | 1080    |
| 11606 | 9 pcw      | HDBR802 | hindbrain      |  | 46, XY  | UNKNOWN |
| 11143 | CS 20      | HDBR803 | brain fragment |  | 46, XY  | 120     |
| 11912 | 9 pcw      | HDBR804 | cerebellum     |  | 46, XY  | 120     |
| 849   | 9 pcw      | HDBR805 | spinal cord    |  | 46, XX  | 190     |
| 11881 | 9 pcw      | HDBR806 | spinal cord    |  | 46, XY  | 120     |
| 11874 | 9 pcw      | HDBR807 | spinal cord    |  | 46, XY  | 120     |
| 11626 | 9 pcw      | HDBR808 | Hindbrain      |  | 46, XX  | 120     |
| 11312 | 9 pcw      | HDBR809 | brain fragment |  | 46, XX  | 120     |
| 11832 | Late 8 pcw | HDBR810 | cerebellum     |  | 46, XX  | 180     |
| 11830 | Late 8 pcw | HDBR811 | cerebellum     |  | 46, XX  | UNKNOWN |
| 11869 | Late 8 pcw | HDBR812 | spinal cord    |  | 46, XX  | 120     |
| 11800 | Late 8 pcw | HDBR813 | spinal cord    |  | 46, XX  | 120     |
| 11492 | Late 8 pcw | HDBR814 | spinal cord    |  | 46, XY  | 120     |
| 11160 | Late 8 pcw | HDBR815 | brain fragment |  | 46, XX  | 120     |
| 11144 | Late 8 pcw | HDBR816 | brain fragment |  | 46, XY  | 120     |

|       |        |         |                                |       |         |         |
|-------|--------|---------|--------------------------------|-------|---------|---------|
| 11589 | 20 pcw | HDBR818 | brain fragment                 |       | 46, XY  | 120     |
| 11876 | CS 21  | HDBR819 | brain fragment                 |       | 46, XY  | 120     |
| 11581 | 19 pcw | HDBR820 | brain fragment                 |       | 46, XY  | 120     |
| 1115  | 17 pcw | HDBR821 | temporal lobe<br>(hippocampus) | right | UNKNOWN | 35      |
| 11808 | 17 pcw | HDBR822 | brain fragment                 |       | 46, XY  | 120     |
| 11580 | 17 pcw | HDBR823 | brain fragment                 |       | 46, XY  | 120     |
| 11464 | 17 pcw | HDBR824 | brain fragment                 |       | 46, XX  | 120     |
| 1107  | 16 pcw | HDBR825 | temporal lobe<br>(hippocampus) | right | UNKNOWN | 45      |
| 11907 | 16 pcw | HDBR826 | cerebellum                     | right | 46, XX  | 1000    |
| 11819 | 16 pcw | HDBR827 | brain fragment                 |       | 46, XX  | 120     |
| 1117  | 15 pcw | HDBR828 | temporal lobe                  | left  | UNKNOWN | 140     |
| 11801 | 15 pcw | HDBR829 | brain fragment                 |       | 46, XX  | 120     |
| 11446 | 15 pcw | HDBR831 | brain fragment                 |       | 46, XY  | 120     |
| 1290  | 14 pcw | HDBR832 | diencephalon                   |       | 46, XY  | 1090    |
| 11900 | 14 pcw | HDBR833 | choroid plexus                 |       | 46, XY  | 1020    |
| 11794 | 14 pcw | HDBR836 | brain fragment                 |       | 46, XX  | 120     |
| 11511 | 14 pcw | HDBR837 | brain fragment                 |       | 46, XY  | 120     |
| 11494 | 14 pcw | HDBR838 | brain fragment                 |       | 46, XY  | 120     |
| 11457 | 14 pcw | HDBR839 | brain fragment                 |       | 46, XX  | 120     |
| 11451 | 14 pcw | HDBR840 | brain fragment                 |       | 46, XY  | 120     |
| 11449 | 14 pcw | HDBR841 | brain fragment                 |       | 46, XY  | 120     |
| 11424 | 14 pcw | HDBR842 | brain fragment                 |       | 46, XX  | 120     |
| 1923  | 13 pcw | HDBR843 | cerebellum                     |       | 46, XX  | 150     |
| 11892 | 13 pcw | HDBR844 | midbrain                       |       | 46, XY  | 120     |
| 11844 | 13 pcw | HDBR845 | midbrain                       |       | 46, XY  | 120     |
| 11817 | 13 pcw | HDBR846 | brain fragment                 |       | 46, XX  | 120     |
| 11775 | 13 pcw | HDBR847 | brain fragment                 |       | 46, XY  | 120     |
| 11654 | 13 pcw | HDBR848 | brain fragment                 |       | 46, XX  | 120     |
| 11947 | 13 pcw | HDBR850 | cerebellum                     |       | 46, XX  | 500     |
| 11496 | 13 pcw | HDBR851 | brain fragment                 |       | 46, XY  | 120     |
| 11489 | 13 pcw | HDBR852 | brain fragment                 |       | 46, XX  | 120     |
| 11423 | 13 pcw | HDBR853 | brain fragment                 |       | 46, XX  | 120     |
| 11349 | 13 pcw | HDBR854 | brain fragment                 |       | 46, XX  | 120     |
| 11309 | 13 pcw | HDBR855 | brain fragment                 |       | 46, XX  | 120     |
| 11305 | 13 pcw | HDBR856 | brain fragment                 |       | 46, XX  | 120     |
| 1835  | 12 pcw | HDBR857 | cortex slice 4 of 4            |       | 46, XY  | UNKNOWN |
| 1118  | 12 pcw | HDBR858 | temporal lobe slice<br>2 of 2  | right | UNKNOWN | 35      |
| 11854 | 12 pcw | HDBR860 | cerebellum                     |       | 46, XY  | 840     |
| 11834 | 12 pcw | HDBR861 | cerebellum                     |       | 46, XY  | 230     |
| 1102  | 12 pcw | HDBR862 | cerebellum                     |       | 46, XX  | 200     |
| 1558  | 12 pcw | HDBR863 | hindbrain                      |       | 46, XX  | 180     |
| 11885 | 12 pcw | HDBR864 | cerebellum                     |       | 46, XY  | UNKNOWN |
| 1047  | 12 pcw | HDBR865 | brain fragment                 |       | 46, XX  | 150     |



|       |        |         |                               |       |         |         |
|-------|--------|---------|-------------------------------|-------|---------|---------|
| 1650  | 12 pcw | HDBR866 | spinal cord                   |       | 46, XX  | 170     |
| 898   | 12 pcw | HDBR867 | spinal cord                   |       | 46, XX  | 105     |
| 11429 | 12 pcw | HDBR868 | spinal cord                   |       | 46, XX  | 120     |
| 11373 | 12 pcw | HDBR869 | brain fragment                |       | 46, XX  | 120     |
| 11602 | 11 pcw | HDBR870 | cerebellum                    |       | 46, XY  | UNKNOWN |
| 11798 | 11 pcw | HDBR871 | brain fragment                |       | 46, XY  | 120     |
| 1110  | 11 pcw | HDBR872 | temporal lobe slice<br>2 of 2 | right | UNKNOWN | 30      |
| 1123  | 11 pcw | HDBR873 | temporal lobe                 | left  | UNKNOWN | 45      |
| 1111  | 11 pcw | HDBR874 | temporal lobe                 | right | UNKNOWN | 30      |
| 11656 | 11 pcw | HDBR876 | hindbrain                     |       | 46, XX  | UNKNOWN |
| 11609 | 11 pcw | HDBR877 | hindbrain                     |       | 46, XX  | UNKNOWN |
| 11833 | 11 pcw | HDBR878 | cerebellum                    |       | 46, XX  | 1800    |
| 11787 | 11 pcw | HDBR881 | spinal cord                   |       | 46, XY  | UNKNOWN |
| 1210  | 11 pcw | HDBR882 | spinal cord                   |       | 46, XX  | UNKNOWN |
| 11893 | 11 pcw | HDBR883 | midbrain                      |       | 46, XX  | 120     |
| 11806 | 11 pcw | HDBR884 | spinal cord                   |       | 46, XX  | 120     |
| 11769 | 11 pcw | HDBR885 | brain fragment                |       | 46, XX  | 120     |
| 11930 | 11 pcw | HDBR886 | cerebellum                    |       | 46, XX  | 180     |
| 11942 | 11 pcw | HDBR887 | cerebellum                    |       | 46, XX  | 1000    |
| 1890  | 10 pcw | HDBR889 | medulla oblongata             |       | UNKNOWN | 120     |
| 1281  | 10 pcw | HDBR890 | hindbrain                     |       | 46, XY  | 180     |
| 1308  | 10 pcw | HDBR891 | cerebellum                    |       | 46, XX  | 120     |
| 1046  | 10 pcw | HDBR892 | diencephalon                  | right | 46, XX  | 120     |
| 1036  | 10 pcw | HDBR893 | choroid plexus                |       | 46, XX  | 120     |
| 11841 | 10 pcw | HDBR894 | cerebellum                    |       | 46, XY  | 120     |
| 1263  | 10 pcw | HDBR896 | spinal cord                   |       | 46, XX  | UNKNOWN |
| 1874  | 10 pcw | HDBR897 | spinal cord                   |       | UNKNOWN | 135     |
| 11880 | 10 pcw | HDBR898 | spinal cord                   |       | 46, XY  | 120     |
| 11573 | 10 pcw | HDBR899 | spinal cord                   |       | 46, XX  | 120     |
| 11921 | 17 pcw | HDBR900 | cerebellum                    |       | 46, XY  | 220     |
| 11942 | 11 pcw | HDBR908 | cortex slice 5 of 5           | right | 46, XX  | 1000    |
| 11666 | 12 pcw | HDBR909 | telencephalon slice<br>4 of 5 | right | 46, XY  | UNKNOWN |
| 11942 | 11 pcw | HDBR910 | temporal lobe slice 1<br>of 2 | right | 46, XX  | 1000    |
| 11942 | 11 pcw | HDBR911 | diencephalon                  | right | 46, XX  | 1000    |
| 11851 | 9 pcw  | HDBR912 | cortex slice 3 of 5           | left  | 46, XX  | 240     |
| 11851 | 9 pcw  | HDBR913 | cortex slice 2 of 5           | left  | 46, XX  | 240     |
| 11851 | 9 pcw  | HDBR914 | cortex slice 4 of 5           | left  | 46, XX  | 240     |
| 11942 | 11 pcw | HDBR915 | temporal lobe slice<br>1 of 2 | left  | 46, XX  | 1000    |
| 12007 | 12 pcw | HDBR916 | cortex slice 5 of 5           | right | 46, XY  | 270     |
| 12007 | 12 pcw | HDBR917 | cortex slice 2 of 5           | right | 46, XY  | 270     |
| 12007 | 12 pcw | HDBR918 | cortex slice 3 of 5           | right | 46, XY  | 270     |
| 11683 | 12 pcw | HDBR919 | midbrain                      | left  | 46, XX  | 960     |

|       |        |         |                            |       |        |         |
|-------|--------|---------|----------------------------|-------|--------|---------|
| 12007 | 12 pcw | HDBR920 | diencephalon               | right | 46, XY | 270     |
| 12007 | 12 pcw | HDBR921 | choroid plexus             | right | 46, XY | 270     |
| 11666 | 12 pcw | HDBR922 | telencephalon slice 2 of 5 | right | 46, XY | UNKNOWN |
| 11666 | 12 pcw | HDBR923 | telencephalon slice 2 of 5 | left  | 46, XY | UNKNOWN |
| 11666 | 12 pcw | HDBR924 | telencephalon slice 4 of 5 | right | 46, XY | UNKNOWN |
| 11666 | 12 pcw | HDBR925 | telencephalon slice 4 of 5 | left  | 46, XY | UNKNOWN |
| 11683 | 12 pcw | HDBR926 | telencephalon slice 2 of 5 | right | 46, XX | 960     |
| 12007 | 12 pcw | HDBR927 | midbrain                   |       | 46, XY | 270     |
| 11683 | 12 pcw | HDBR928 | hindbrain                  | right | 46, XX | 960     |
| 11683 | 12 pcw | HDBR929 | midbrain                   | right | 46, XX | 960     |
| 12007 | 12 pcw | HDBR930 | cortex slice 4 of 5        | left  | 46, XY | 270     |
| 12007 | 12 pcw | HDBR931 | diencephalon               | left  | 46, XY | 270     |
| 12007 | 12 pcw | HDBR932 | basal ganglia              | left  | 46, XY | 270     |
| 12007 | 12 pcw | HDBR933 | choroid plexus             | left  | 46, XY | 270     |
| 11666 | 12 pcw | HDBR934 | hindbrain                  | left  | 46, XY | UNKNOWN |
| 11666 | 12 pcw | HDBR935 | hindbrain                  | right | 46, XY | UNKNOWN |
| 11666 | 12 pcw | HDBR936 | midbrain                   | right | 46, XY | UNKNOWN |
| 11653 | 10 pcw | HDBR937 | telencephalon slice 4 of 5 | right | 46, XY | UNKNOWN |
| 11683 | 12 pcw | HDBR938 | telencephalon slice 4 of 5 | right | 46, XX | 960     |
| 11683 | 12 pcw | HDBR939 | telencephalon slice 4 of 5 | left  | 46, XX | 960     |
| 11930 | 11 pcw | HDBR940 | cortex slice 5 of 5        | left  | 46, XX | 180     |
| 12007 | 12 pcw | HDBR941 | basal ganglia              | right | 46, XY | 270     |
| 11653 | 10 pcw | HDBR943 | telencephalon slice 4 of 5 | left  | 46, XY | UNKNOWN |
| 11653 | 10 pcw | HDBR944 | telencephalon slice 2 of 5 | right | 46, XY | UNKNOWN |
| 11653 | 10 pcw | HDBR945 | telencephalon slice 2 of 5 | left  | 46, XY | UNKNOWN |
| 11930 | 11 pcw | HDBR946 | cortex slice 3 of 5        | left  | 46, XX | 180     |
| 11653 | 10 pcw | HDBR947 | midbrain                   | right | 46, XY | UNKNOWN |
| 12007 | 12 pcw | HDBR948 | cortex slice 1 of 5        | left  | 46, XY | 270     |
| 12007 | 12 pcw | HDBR949 | cortex slice 5 of 5        | left  | 46, XY | 270     |
| 11942 | 11 pcw | HDBR950 | basal ganglia              | right | 46, XX | 1000    |
| 11942 | 11 pcw | HDBR951 | choroid plexus             | left  | 46, XX | 1000    |
| 11930 | 11 pcw | HDBR952 | cortex slice 4 of 5        | left  | 46, XX | 180     |
| 11930 | 11 pcw | HDBR953 | cortex slice 2 of 5        | left  | 46, XX | 180     |
| 11930 | 11 pcw | HDBR954 | cortex slice 2 of 5        | right | 46, XX | 180     |
| 11930 | 11 pcw | HDBR955 | cortex slice 3 of 5        | right | 46, XX | 180     |

|       |        |         |                     |       |        |         |
|-------|--------|---------|---------------------|-------|--------|---------|
| 11930 | 11 pcw | HDBR956 | cortex slice 4 of 5 | right | 46, XX | 180     |
| 11930 | 11 pcw | HDBR957 | cortex slice 1 of 5 | left  | 46, XX | 180     |
| 11820 | 9 pcw  | HDBR965 | cortex slice 3 of 4 | right | 46, XY | UNKNOWN |
| 11653 | 10 pcw | HDBR966 | midbrain            | left  | 46, XY | UNKNOWN |
| 11666 | 12 pcw | HDBR967 | midbrain            | left  | 46, XY | UNKNOWN |
| 11683 | 12 pcw | HDBR968 | midbrain            | left  | 46, XX | 960     |
| 12007 | 12 pcw | HDBR969 | cortex slice 1 of 5 | right | 46, XY | 270     |
