# Supplementary material for: HDBR Expression: A Unique Resource for Global and Individual Gene Expression Studies during Early Human Brain Development
Source: PubMed Central journal article supplement (PMC5080337; doi:10.3389/fnana.2016.00086), 2016-10-26
Supplement: Table2.pdf [file Table2.pdf]

**Supplementary Table 2**

**SNP genotyping**

**a) details of tissues used for SNP genotyping**

|  |                                                                                                                                      |
|--|--------------------------------------------------------------------------------------------------------------------------------------|
|  | RNAseq and SNP genotype data from these samples, RNA and DNA available                                                               |
|  | SNP genotype data from these samples, no RNAseq data, DNA available                                                                  |
|  | SNP genotype data from DNA only samples (to replace samples that failed DNA QC), RNAseq data from other tissues from same individual |

| HDBR embryo or fetus # | Stage of embryo or fetus | Tissue Sample ID number | tissue morphology of sample | left or right | Karyotype | time sample in transit (minutes) |
|------------------------|--------------------------|-------------------------|-----------------------------|---------------|-----------|----------------------------------|
| 11793                  | CS 22                    | HDBR375                 | brain fragment              |               | 46, XY    | 120                              |
| 11849                  | CS 21                    | HDBR380                 | brain fragment              |               | 46, XY    | 120                              |
| 11566                  | CS 19                    | HDBR383                 | brain fragment              |               | 46, XX    | 120                              |
| 11626                  | 9 pcw                    | HDBR469                 | forebrain fragment          |               | 46, XX    | 120                              |
| 11122                  | CS 18                    | HDBR701                 | brain fragment              |               | 46, XX    | 120                              |
| 11238                  | CS 19                    | HDBR702                 | brain fragment              |               | 46, XX    | 120                              |
| 11286                  | CS 19                    | HDBR703                 | brain fragment              |               | 46, XY    | 120                              |
| 11287                  | CS 20                    | HDBR705                 | hindbrain                   |               | 46, XY    | 120                              |
| 11237                  | CS 20                    | HDBR706                 | brain fragment              |               | 46, XY    | 120                              |
| 11382                  | CS 20                    | HDBR707                 | brain fragment              |               | 46, XY    | 120                              |
| 11254                  | CS 21                    | HDBR708                 | brain fragment              |               | 46, XY    | 120                              |
| 11471                  | CS 21                    | HDBR709                 | brain fragment              |               | 46, XY    | 120                              |
| 11811                  | CS 21                    | HDBR710                 | spinal cord                 |               | 46, XX    | 120                              |
| 11875                  | 19 pcw                   | HDBR712                 | brain fragment              |               | 46, XY    | 120                              |
| 11882                  | CS 21                    | HDBR713                 | midbrain                    |               | 46, XX    | 120                              |
| 11304                  | CS 21                    | HDBR714                 | brain fragment              |               | 46, XX    | 120                              |
| 11165                  | CS 21                    | HDBR715                 | brain fragment              |               | 46, XX    | 120                              |

|       |        |         |                   |       |         |         |
|-------|--------|---------|-------------------|-------|---------|---------|
| 11501 | 13 pcw | HDBR716 | spinal cord       |       | 46, XY  | 120     |
| 11814 | CS 22  | HDBR717 | cerebellum        | right | 46, XY  | UNKNOWN |
| 11815 | CS 22  | HDBR718 | cerebellum        |       | 46, XX  | UNKNOWN |
| 11828 | CS 22  | HDBR720 | cerebellum        |       | 46, XX  | UNKNOWN |
| 11829 | CS 22  | HDBR721 | cerebellum        |       | 46, XY  | 180     |
| 11831 | CS 22  | HDBR722 | cerebellum        |       | 46, XY  | UNKNOWN |
| 11858 | CS 22  | HDBR723 | cerebellum        |       | 46, XY  | 120     |
| 11865 | CS 22  | HDBR724 | cerebellum        |       | 46, XY  | UNKNOWN |
| 11871 | CS 22  | HDBR725 | cerebellum        |       | 46, XX  | 240     |
| 11878 | CS 22  | HDBR726 | cerebellum        | right | 46, XX  | UNKNOWN |
| 1707  | CS 22  | HDBR727 | brain<br>fragment |       | 46, XX  | 120     |
| 1092  | CS 22  | HDBR728 | spinal cord       |       | 46, XX  | UNKNOWN |
| 11868 | CS 22  | HDBR729 | spinal cord       |       | 46, XX  | 120     |
| 11443 | CS 22  | HDBR731 | spinal cord       |       | 46, XX  | 120     |
| 11410 | CS 22  | HDBR732 | spinal cord       |       | 46, XY  | 120     |
| 1406  | CS 23  | HDBR733 | hindbrain         |       | 46, XX  | 240     |
| 1607  | CS 23  | HDBR734 | brain<br>fragment |       | 46, XX  | 215     |
| 11823 | CS 23  | HDBR735 | cerebellum        |       | 46, XY  | 120     |
| 11826 | CS 23  | HDBR736 | cerebellum        |       | 46, XX  | 120     |
| 11827 | CS 23  | HDBR737 | cerebellum        |       | 46, XX  | 120     |
| 11846 | CS 23  | HDBR738 | cerebellum        |       | 46, XX  | 1800    |
| 11848 | CS 23  | HDBR739 | hindbrain         | right | 46, XY  | 120     |
| 11884 | CS 23  | HDBR740 | cerebellum        |       | 46, XX  | 230     |
| 1851  | CS 23  | HDBR741 | temporal lobe     |       | UNKNOWN | UNKNOWN |
| 2193  | CS 23  | HDBR743 | brain<br>fragment |       | 46, XY  | 240     |
| 11918 | CS 23  | HDBR744 | cerebellum        |       | 46, XX  | 120     |
| 11860 | CS 23  | HDBR745 | spinal cord       |       | 46, XX  | 120     |
| 11843 | CS 23  | HDBR746 | spinal cord       |       | 46, XX  | 120     |
| 11824 | CS 23  | HDBR747 | spinal cord       |       | 46, XY  | 120     |
| 11444 | CS 23  | HDBR748 | spinal cord       |       | 46, XY  | 120     |
| 11402 | CS 23  | HDBR749 | spinal cord       |       | 46, XX  | 120     |
| 11120 | CS 23  | HDBR750 | brain<br>fragment |       | 46, XY  | 120     |
| 11354 | CS 20  | HDBR751 | brain<br>fragment |       | 46, XY  | 120     |
| 11245 | CS 20  | HDBR752 | brain<br>fragment |       | 46, XX  | 120     |
| 11241 | CS 20  | HDBR753 | brain<br>fragment |       | 46, XX  | 120     |
| 11156 | CS 20  | HDBR754 | brain<br>fragment |       | 46, XY  | 120     |
| 11149 | CS 20  | HDBR755 | hindbrain         |       | 46, XX  | 120     |

|       |       |         |                |                 |         |         |
|-------|-------|---------|----------------|-----------------|---------|---------|
| 11920 | CS 23 | HDBR756 | diencephalon   |                 | 46, XY  | 170     |
| 11121 | CS 20 | HDBR757 | cortex         |                 | 46, XY  | 120     |
| 11118 | CS 20 | HDBR758 | forebrain      |                 | 46, XX  | 120     |
| 1039  | CS 19 | HDBR759 | spinal cord    |                 | 46, XX  | UNKNOWN |
| 1319  | CS 19 | HDBR760 | hindbrain      |                 | 46, XX  | 180     |
| 11894 | CS 19 | HDBR762 | brain fragment |                 | 46, XY  | 120     |
| 11856 | CS 19 | HDBR763 | spinal cord    |                 | 46, XY  | 120     |
| 11514 | CS 19 | HDBR765 | spinal cord    |                 | 46, XX  | 120     |
| 11470 | CS 19 | HDBR766 | brain fragment |                 | 46, XX  | 120     |
| 11363 | CS 19 | HDBR767 | brain fragment |                 | 46, XX  | 120     |
| 11323 | CS 19 | HDBR768 | brain fragment |                 | 46, XX  | 120     |
| 11320 | CS 19 | HDBR769 | brain fragment |                 | 46, XY  | 120     |
| 11318 | CS 19 | HDBR770 | brain fragment |                 | 46, XY  | 120     |
| 11317 | CS 19 | HDBR771 | brain fragment |                 | 46, XY  | 120     |
| 11300 | CS 19 | HDBR772 | brain fragment |                 | 46, XY  | 120     |
| 11904 | CS 18 | HDBR774 | hindbrain      |                 | 46, XY  | UNKNOWN |
| 1038  | CS 18 | HDBR775 | spinal cord    |                 | 46, XY  | UNKNOWN |
| 11859 | CS 18 | HDBR776 | brain fragment |                 | 46, XY  | 120     |
| 11770 | CS 18 | HDBR777 | spinal cord    |                 | 46, XX  | 120     |
| 11627 | CS 18 | HDBR778 | spinal cord    |                 | 46, XX  | 120     |
| 11469 | CS 18 | HDBR779 | brain fragment |                 | 46, XX  | 120     |
| 11456 | CS 18 | HDBR780 | spinal cord    |                 | 46, XX  | 120     |
| 11322 | CS 18 | HDBR782 | brain fragment |                 | 46, XY  | 120     |
| 11288 | CS 18 | HDBR783 | hindbrain      | NO RNA-SEQ DATA | UNKNOWN | 120     |
| 11234 | CS 18 | HDBR784 | brain fragment |                 | 46, XX  | 120     |
| 11395 | CS 17 | HDBR785 | brain fragment |                 | 46, XY  | 120     |
| 11321 | CS 17 | HDBR786 | brain fragment |                 | 46, XY  | 120     |
| 11931 | CS 17 | HDBR787 | spinal cord    |                 | UNKNOWN | UNKNOWN |

|       |            |         |                |                 |         |         |
|-------|------------|---------|----------------|-----------------|---------|---------|
| 11748 | CS 17      | HDBR788 | hindbrain      | NO RNA-SEQ DATA | UNKNOWN | UNKNOWN |
| 11616 | CS17       | HDBR789 | hindbrain      | NO RNA-SEQ DATA | 46, XX  | 180     |
| 11513 | CS 16      | HDBR790 | spinal cord    |                 | 46, XY  | 120     |
| 11334 | CS 16      | HDBR791 | brain fragment |                 | 46, XX  | 120     |
| 11397 | CS 15      | HDBR792 | brain fragment |                 | 46, XX  | 120     |
| 11405 | CS 15      | HDBR793 | brain fragment |                 | 46, XX  | 120     |
| 11840 | CS 14      | HDBR794 | hindbrain      |                 | 46, XX  | 120     |
| 11837 | CS 14      | HDBR795 | hindbrain      |                 | 46, XY  | 180     |
| 11903 | CS 13      | HDBR796 | midbrain       |                 | 46, XX  | 315     |
| 11810 | 9 pcw      | HDBR797 | hindbrain      |                 | 46, XX  | 120     |
| 11845 | 9 pcw      | HDBR798 | cerebellum     |                 | 46, XY  | 120     |
| 11851 | 9 pcw      | HDBR799 | cerebellum     |                 | 46, XX  | 240     |
| 1834  | 12 pcw     | HDBR801 | midbrain       | NO RNA-SEQ DATA | UNKNOWN | UNKNOWN |
| 11606 | 9 pcw      | HDBR802 | hindbrain      |                 | 46, XY  | UNKNOWN |
| 11143 | CS 20      | HDBR803 | brain fragment |                 | 46, XY  | 120     |
| 849   | 9 pcw      | HDBR805 | spinal cord    |                 | 46, XX  | 190     |
| 11881 | 9 pcw      | HDBR806 | spinal cord    |                 | 46, XY  | 120     |
| 11874 | 9 pcw      | HDBR807 | spinal cord    |                 | 46, XY  | 120     |
| 11312 | 9 pcw      | HDBR809 | brain fragment |                 | 46, XX  | 120     |
| 11832 | Late 8 pcw | HDBR810 | cerebellum     |                 | 46, XX  | 180     |
| 11830 | Late 8 pcw | HDBR811 | cerebellum     |                 | 46, XX  | UNKNOWN |
| 11869 | Late 8 pcw | HDBR812 | spinal cord    |                 | 46, XX  | 120     |
| 11800 | Late 8 pcw | HDBR813 | spinal cord    |                 | 46, XX  | 120     |
| 11492 | Late 8 pcw | HDBR814 | spinal cord    |                 | 46, XY  | 120     |
| 11160 | Late 8 pcw | HDBR815 | brain fragment |                 | 46, XX  | 120     |
| 11144 | Late 8 pcw | HDBR816 | brain fragment |                 | 46, XY  | 120     |
| 11142 | Late 8 pcw | HDBR817 | brain fragment | NO RNA-SEQ DATA | 46, XY  | 120     |
| 11589 | 20 pcw     | HDBR818 | brain fragment |                 | 46, XY  | 120     |
| 11876 | CS 21      | HDBR819 | brain fragment |                 | 46, XY  | 120     |

|       |        |         |                             |                 |         |         |
|-------|--------|---------|-----------------------------|-----------------|---------|---------|
| 11581 | 19 pcw | HDBR820 | brain fragment              |                 | 46, XY  | 120     |
| 1115  | 17 pcw | HDBR821 | temporal lobe (hippocampus) | right           | UNKNOWN | 35      |
| 11808 | 17 pcw | HDBR822 | brain fragment              |                 | 46, XY  | 120     |
| 11580 | 17 pcw | HDBR823 | brain fragment              |                 | 46, XY  | 120     |
| 11464 | 17 pcw | HDBR824 | brain fragment              |                 | 46, XX  | 120     |
| 1107  | 16 pcw | HDBR825 | temporal lobe (hippocampus) | right           | UNKNOWN | 45      |
| 11907 | 16 pcw | HDBR826 | cerebellum                  | right           | 46, XX  | 1000    |
| 11819 | 16 pcw | HDBR827 | brain fragment              |                 | 46, XX  | 120     |
| 1117  | 15 pcw | HDBR828 | temporal lobe               | left            | UNKNOWN | 140     |
| 11801 | 15 pcw | HDBR829 | brain fragment              |                 | 46, XX  | 120     |
| 11484 | 15 pcw | HDBR830 | spinal cord                 | NO RNA-SEQ DATA | 46, XX  | 120     |
| 11446 | 15 pcw | HDBR831 | brain fragment              |                 | 46, XY  | 120     |
| 1290  | 14 pcw | HDBR832 | diencephalon                |                 | 46, XY  | 1090    |
| 1836  | 14 pcw | HDBR834 | spinal cord                 | NO RNA-SEQ DATA | 46, XX  | UNKNOWN |
| 872   | 14 pcw | HDBR835 | spinal cord                 | NO RNA-SEQ DATA | 46, XY  | 200     |
| 11794 | 14 pcw | HDBR836 | brain fragment              |                 | 46, XX  | 120     |
| 11511 | 14 pcw | HDBR837 | brain fragment              |                 | 46, XY  | 120     |
| 11494 | 14 pcw | HDBR838 | brain fragment              |                 | 46, XY  | 120     |
| 11457 | 14 pcw | HDBR839 | brain fragment              |                 | 46, XX  | 120     |
| 11451 | 14 pcw | HDBR840 | brain fragment              |                 | 46, XY  | 120     |

|       |        |         |                            |                 |         |         |
|-------|--------|---------|----------------------------|-----------------|---------|---------|
| 11449 | 14 pcw | HDBR841 | brain fragment             |                 | 46, XY  | 120     |
| 11424 | 14 pcw | HDBR842 | brain fragment             |                 | 46, XX  | 120     |
| 1923  | 13 pcw | HDBR843 | cerebellum                 |                 | 46, XX  | 150     |
| 11892 | 13 pcw | HDBR844 | midbrain                   |                 | 46, XY  | 120     |
| 11844 | 13 pcw | HDBR845 | midbrain                   |                 | 46, XY  | 120     |
| 11817 | 13 pcw | HDBR846 | brain fragment             |                 | 46, XX  | 120     |
| 11654 | 13 pcw | HDBR848 | brain fragment             |                 | 46, XX  | 120     |
| 11572 | 13 pcw | HDBR849 | brain fragment             | NO RNA-SEQ DATA | UNKNOWN | 120     |
| 11947 | 13 pcw | HDBR850 | cerebellum                 |                 | 46, XX  | 500     |
| 11496 | 13 pcw | HDBR851 | brain fragment             |                 | 46, XY  | 120     |
| 11489 | 13 pcw | HDBR852 | brain fragment             |                 | 46, XX  | 120     |
| 11423 | 13 pcw | HDBR853 | brain fragment             |                 | 46, XX  | 120     |
| 11349 | 13 pcw | HDBR854 | brain fragment             |                 | 46, XX  | 120     |
| 11309 | 13 pcw | HDBR855 | brain fragment             |                 | 46, XX  | 120     |
| 11305 | 13 pcw | HDBR856 | brain fragment             |                 | 46, XX  | 120     |
| 1835  | 12 pcw | HDBR857 | cortex slice 4 of 4        |                 | 46, XY  | UNKNOWN |
| 1118  | 12 pcw | HDBR858 | temporal lobe slice 2 of 2 | right           | UNKNOWN | 35      |
| 1119  | 12 pcw | HDBR859 | temporal lobe slice 2 of 2 | NO RNA-SEQ DATA | UNKNOWN | 50      |
| 11854 | 12 pcw | HDBR860 | cerebellum                 |                 | 46, XY  | 840     |
| 11834 | 12 pcw | HDBR861 | cerebellum                 |                 | 46, XY  | 230     |
| 1102  | 12 pcw | HDBR862 | cerebellum                 |                 | 46, XX  | 200     |
| 1558  | 12 pcw | HDBR863 | hindbrain                  |                 | 46, XX  | 180     |
| 11885 | 12 pcw | HDBR864 | cerebellum                 |                 | 46, XY  | UNKNOWN |
| 1650  | 12 pcw | HDBR866 | spinal cord                |                 | 46, XX  | 170     |
| 898   | 12 pcw | HDBR867 | spinal cord                |                 | 46, XX  | 105     |
| 11429 | 12 pcw | HDBR868 | spinal cord                |                 | 46, XX  | 120     |
| 11373 | 12 pcw | HDBR869 | brain fragment             |                 | 46, XX  | 120     |
| 11602 | 11 pcw | HDBR870 | cerebellum                 |                 | 46, XY  | UNKNOWN |

|       |        |         |                            |                 |         |         |
|-------|--------|---------|----------------------------|-----------------|---------|---------|
| 11798 | 11 pcw | HDBR871 | brain fragment             |                 | 46, XY  | 120     |
| 1110  | 11 pcw | HDBR872 | temporal lobe slice 2 of 2 | right           | UNKNOWN | 30      |
| 1123  | 11 pcw | HDBR873 | temporal lobe              | left            | UNKNOWN | 45      |
| 1111  | 11 pcw | HDBR874 | temporal lobe              | right           | UNKNOWN | 30      |
| 1131  | 11 pcw | HDBR875 | cerebellum                 | NO RNA-SEQ DATA | UNKNOWN | UNKNOWN |
| 11656 | 11 pcw | HDBR876 | hindbrain                  |                 | 46, XX  | UNKNOWN |
| 11609 | 11 pcw | HDBR877 | hindbrain                  |                 | 46, XX  | UNKNOWN |
| 11833 | 11 pcw | HDBR878 | cerebellum                 |                 | 46, XX  | 1800    |
| 1116  | 11 pcw | HDBR879 | spinal cord                | NO RNA-SEQ DATA | UNKNOWN | 60      |
| 1845  | 11 pcw | HDBR880 | spinal cord                | NO RNA-SEQ DATA | 46, XX  | 1200    |
| 11787 | 11 pcw | HDBR881 | spinal cord                |                 | 46, XY  | UNKNOWN |
| 1210  | 11 pcw | HDBR882 | spinal cord                |                 | 46, XX  | UNKNOWN |
| 11893 | 11 pcw | HDBR883 | midbrain                   |                 | 46, XX  | 120     |
| 11806 | 11 pcw | HDBR884 | spinal cord                |                 | 46, XX  | 120     |
| 11769 | 11 pcw | HDBR885 | brain fragment             |                 | 46, XX  | 120     |
| 11930 | 11 pcw | HDBR886 | cerebellum                 |                 | 46, XX  | 180     |
| 11942 | 11 pcw | HDBR887 | cerebellum                 |                 | 46, XX  | 1000    |
| 1132  | 10 pcw | HDBR888 | spinal cord                | NO RNA-SEQ DATA | UNKNOWN | 30      |
| 1890  | 10 pcw | HDBR889 | medulla oblongata          |                 | UNKNOWN | 120     |
| 1281  | 10 pcw | HDBR890 | hindbrain                  |                 | 46, XY  | 180     |
| 1308  | 10 pcw | HDBR891 | cerebellum                 |                 | 46, XX  | 120     |
| 1046  | 10 pcw | HDBR892 | diencephalon               | right           | 46, XX  | 120     |
| 11841 | 10 pcw | HDBR894 | cerebellum                 |                 | 46, XY  | 120     |
| 1840  | 10 pcw | HDBR895 | spinal cord                | NO RNA-SEQ DATA | UNKNOWN | UNKNOWN |
| 1263  | 10 pcw | HDBR896 | spinal cord                |                 | 46, XX  | UNKNOWN |
| 1874  | 10 pcw | HDBR897 | spinal cord                |                 | UNKNOWN | 135     |
| 11880 | 10 pcw | HDBR898 | spinal cord                |                 | 46, XY  | 120     |
| 11573 | 10 pcw | HDBR899 | spinal cord                |                 | 46, XX  | 120     |

|       |        |         |                        |       |        |         |
|-------|--------|---------|------------------------|-------|--------|---------|
| 11873 | 9 pcw  | HDBR958 | spinal cord            |       | 46, XX | 1080    |
| 11912 | 9 pcw  | HDBR959 | spinal cord            |       | 46, XY | 120     |
| 11900 | 14 pcw | HDBR960 | placenta               |       | 46, XY | 1020    |
| 1406  | CS23   | HDBR962 | lung                   |       | 46, XX | 240     |
| 11820 | 9 pcw  | HDBR965 | cortex slice 3<br>of 4 | right | 46, XY | UNKNOWN |
| 11653 | 10 pcw | HDBR966 | midbrain               | left  | 46, XY | UNKNOWN |
| 11666 | 12 pcw | HDBR967 | midbrain               | left  | 46, XY | UNKNOWN |
| 11683 | 12 pcw | HDBR968 | midbrain               | left  | 46, XX | 960     |
| 12007 | 12 pcw | HDBR969 | cortex slice 1<br>of 5 | right | 46, XY | 270     |

**b) details of tissues in wax blocks**

| wax block              |                                        |                         |                                |                        |           |                                  |
|------------------------|----------------------------------------|-------------------------|--------------------------------|------------------------|-----------|----------------------------------|
| HDBR embryo or fetus # | Developmental stage of embryo or fetus | Tissue Sample ID number | tissue used for SNP genotyping | tissue in wax block(s) | Karyotype | time sample in transit (minutes) |
| 11577                  | 14 pcw                                 | HDBR001                 | skin                           | head                   | 46, XY    | 240                              |
| 2197                   | CS 17                                  | HDBR002                 | skin                           | embryo                 | 46, XY    | 110                              |
| 2112                   | CS 22                                  | HDBR003                 | placenta                       | head                   | 46, XX    | UNKNOWN                          |
| 2138                   | CS 22                                  | HDBR004                 | skin                           | head,<br>body          | 46, XX    | 240                              |
| 2113                   | CS 17                                  | HDBR005                 | placenta                       | embryo                 | 46, XY    | 210                              |
| 2082                   | CS 22                                  | HDBR006                 | skin                           | head                   | 46, XY    | 90                               |
| 2089                   | CS 22                                  | HDBR007                 | placenta                       | head,<br>body          | 46, XX    | 165                              |
| 2072                   | CS 22                                  | HDBR008                 | skin                           | head                   | 46, XX    | 240                              |
| 2153                   | CS 17                                  | HDBR009                 | placenta                       | embryo,                | 46, XX    | UNKNOWN                          |
| 1238                   | CS 21                                  | HDBR010                 | skin                           | embryo                 | 46, XY    | 80                               |
| 2096                   | CS 21                                  | HDBR011                 | placenta                       | embryo                 | 46, XX    | 180                              |
| 2050                   | CS 22                                  | HDBR012                 | skin                           | head,<br>body          | 46, XX    | 120                              |
| 2026                   | CS 19                                  | HDBR013                 | skin                           | embryo                 | 46, XX    | 120                              |
| 2144                   | CS 18                                  | HDBR014                 | placenta                       | embryo,                | 46, XX    | 115                              |
| 2145                   | CS 18                                  | HDBR015                 | placenta                       | embryo,                | 46, XX    | 130                              |
| 2191                   | CS 18                                  | HDBR016                 | placenta                       | embryo                 | 46, XX    | 60                               |
| 2094                   | CS 19                                  | HDBR017                 | skin                           | embryo                 | 46, XX    | UNKNOWN                          |
| 1248                   | CS 23                                  | HDBR018                 | skin                           | head,<br>body          | 46, XX    | 180                              |
| 1260                   | CS 23                                  | HDBR019                 | UNKNOWN                        | head,<br>body          | 46, XX    | 100                              |
| 1265                   | CS 23                                  | HDBR020                 | skin                           | head,<br>body          | 46, XY    | 175                              |



|      |        |         |          |                   |         |     |
|------|--------|---------|----------|-------------------|---------|-----|
| 1280 | CS 23  | HDBR021 | skin     | head,<br>body     | 46, XX  | 180 |
| 1778 | CS 23  | HDBR022 | skin     | head,<br>body     | 46, XY  | 90  |
| 1294 | CS 23  | HDBR023 | skin     | head,<br>body     | 46, XX  | 60  |
| 1298 | CS 23  | HDBR024 | skin     | head,<br>body     | 46, XY  | 120 |
| 1301 | CS 23  | HDBR025 | skin     | head,<br>body     | 46, XY  | 90  |
| 1302 | CS 23  | HDBR026 | placenta | head,<br>body     | 46, XX  | 60  |
| 1310 | CS 23  | HDBR027 | skin     | head,<br>body     | 46, XX  | 30  |
| 1259 | CS 23  | HDBR028 | placenta | head,<br>torso    | 46, XX  | 240 |
| 1258 | CS 23  | HDBR029 | placenta | head              | 46, XY  | 120 |
| 1303 | CS 22  | HDBR031 | placenta | head,<br>body     | 46, XY  | 180 |
| 1306 | CS 22  | HDBR032 | skin     | embryo            | 46, XX  | 90  |
| 1291 | CS 21  | HDBR033 | skin     | embryo            | 46, XY  | 78  |
| 1267 | 10 pcw | HDBR034 | skin     | telencep<br>halon | UNKNOWN | 110 |
| 1300 | CS 19  | HDBR035 | skin     | embryo            | 46, XX  | 120 |
| 1307 | CS 19  | HDBR036 | skin     | embryo            | 46, XY  | 150 |
| 1311 | CS 18  | HDBR037 | placenta | embryo            | 46, XX  | 210 |
| 1230 | CS 14  | HDBR038 | placenta | embryo            | 46, XY  | 240 |
| 1254 | CS 14  | HDBR039 | placenta | embryo            | 46, XX  | 100 |
| 1283 | CS 14  | HDBR040 | placenta | embryo            | 46, XY  | 80  |
| 1286 | CS 14  | HDBR041 | placenta | embryo            | 46, XX  | 110 |
| 1282 | CS 13  | HDBR042 | placenta | embryo            | 46, XY  | 270 |
| 1313 | CS 12  | HDBR044 | skin     | embryo            | 46, XX  | 120 |
| 1234 | CS 17  | HDBR045 | placenta | embryo            | 46, XY  | 330 |
| 1284 | CS 17  | HDBR047 | placenta | embryo            | 46, XY  | 150 |
| 1305 | CS 15  | HDBR048 | placenta | embryo            | 46, XY  | 75  |
| 1315 | CS 17  | HDBR049 | placenta | embryo            | 46, XY  | 210 |
| 1231 | CS 16  | HDBR050 | placenta | embryo            | 46, XY  | 260 |
| 1240 | CS 16  | HDBR051 | skin     | embryo            | 46, XX  | 150 |
| 1268 | CS 16  | HDBR052 | placenta | embryo            | 46, XX  | 160 |
| 1304 | CS 16  | HDBR053 | placenta | embryo            | 46, XY  | 280 |
| 1334 | CS 23  | HDBR055 | placenta | head,<br>body     | 46, XY  | 40  |
| 1335 | CS 23  | HDBR056 | placenta | head,<br>body     | 46, XX  | 90  |
| 1385 | CS 23  | HDBR057 | skin     | head              | 46, XY  | 150 |
| 1408 | CS 23  | HDBR058 | placenta | head,<br>body     | 46, XX  | 150 |
| 1363 | CS 21  | HDBR059 | placenta | embryo,           | 46, XY  | 300 |

|       |        |         |          |                                   |         |         |
|-------|--------|---------|----------|-----------------------------------|---------|---------|
| 11761 | 12 pcw | HDBR060 | skin     | cortex,<br>midbrain,<br>hindbrain | 46, XX  | UNKNOWN |
| 1339  | CS 20  | HDBR061 | skin     | embryo,                           | 46, XY  | 205     |
| 1353  | CS 20  | HDBR062 | skin     | embryo,                           | 46, XX  | UNKNOWN |
| 1404  | CS 20  | HDBR064 | skin     | embryo,                           | 46, XX  | 360     |
| 1324  | CS 17  | HDBR065 | placenta | embryo                            | 46, XX  | 180     |
| 1337  | CS 17  | HDBR066 | skin     | embryo,                           | 46, XY  | UNKNOWN |
| 1344  | CS 17  | HDBR067 | skin     | embryo,                           | 46, XY  | 85      |
| 1402  | CS 17  | HDBR068 | skin     | embryo,                           | 46, XX  | 160     |
| 1348  | CS 19  | HDBR069 | skin     | embryo,                           | 46, XY  | 100     |
| 1350  | CS 19  | HDBR070 | skin     | embryo,                           | 46, XX  | 180     |
| 1360  | CS 19  | HDBR071 | skin     | embryo,                           | 46, XY  | 225     |
| 1378  | CS 19  | HDBR072 | skin     | embryo,                           | 46, XX  | UNKNOWN |
| 1366  | CS 18  | HDBR073 | placenta | embryo,                           | 46, XY  | 180     |
| 1365  | CS 15  | HDBR074 | skin     | embryo,                           | 46, XX  | 90      |
| 1374  | CS 15  | HDBR075 | UNKNOWN  | embryo,                           | UNKNOWN | UNKNOWN |
| 1400  | CS 15  | HDBR076 | skin     | embryo,                           | 46, XY  | 114     |
| 1356  | CS 14  | HDBR078 | placenta | embryo,                           | 46, XX  | 70      |
| 1379  | CS 14  | HDBR079 | placenta | embryo,                           | 46, XY  | 270     |
| 1340  | CS 13  | HDBR080 | skin     | embryo,                           | 46, XY  | 105     |
| 1419  | CS 23  | HDBR081 | skin     | head,<br>body                     | 46, XX  | 180     |
| 1458  | CS 22  | HDBR082 | placenta | head,<br>body                     | 46, XY  | 210     |
| 1477  | CS 22  | HDBR083 | skin     | head,<br>body                     | 46, XX  | 165     |
| 11855 | 10 pcw | HDBR084 | placenta | head,<br>body                     | 46, XX  | 800     |
| 1452  | CS 21  | HDBR085 | skin     | embryo                            | 46, XY  | 150     |
| 1463  | CS 21  | HDBR086 | skin     | embryo                            | 46, XY  | 100     |
| 1486  | CS 21  | HDBR087 | skin     | embryo                            | 46, XX  | 205     |
| 1465  | CS 20  | HDBR088 | skin     | embryo                            | 46, XY  | 130     |
| 1469  | CS 22  | HDBR089 | placenta | embryo                            | 46, XY  | 70      |
| 1414  | CS 17  | HDBR090 | skin     | embryo,                           | 46, XX  | 100     |
| 1475  | CS 17  | HDBR091 | skin     | embryo                            | 46, XX  | 260     |
| 1489  | CS 17  | HDBR092 | skin     | embryo                            | 46, XX  | 158     |
| 1438  | CS 16  | HDBR093 | skin     | embryo                            | 46, XX  | 175     |
| 1445  | CS 19  | HDBR095 | placenta | embryo                            | 46, XX  | 120     |
| 1461  | CS 18  | HDBR096 | placenta | embryo                            | 46, XY  | 150     |
| 1480  | CS 18  | HDBR097 | skin     | embryo                            | 46, XY  | 130     |
| 1413  | CS 14  | HDBR098 | skin     | embryo,                           | 46, XY  | 90      |
| 1447  | CS 14  | HDBR100 | placenta | embryo                            | 46, XX  | 270     |
| 1485  | CS 14  | HDBR101 | skin     | embryo                            | 46, XX  | 145     |
| 1490  | CS 14  | HDBR102 | skin     | embryo                            | 46, XX  | 145     |

|      |        |         |          |               |         |         |
|------|--------|---------|----------|---------------|---------|---------|
| 1434 | CS 13  | HDBR103 | placenta | embryo        | 46, XX  | 150     |
| 1446 | CS 13  | HDBR104 | placenta | embryo        | 46, XX  | 270     |
| 1506 | CS 13  | HDBR105 | skin     | embryo        | 46, XY  | 180     |
| 1507 | CS 13  | HDBR106 | skin     | embryo        | 46, XY  | UNKNOWN |
| 1497 | 9 pcw  | HDBR109 | skin     | brain         | 46, XY  | 120     |
| 1444 | 11 pcw | HDBR110 | skin     | cortex        | 46, XX  | 170     |
| 1555 | CS 22  | HDBR111 | skin     | head,<br>body | 46, XY  | 300     |
| 1537 | CS 17  | HDBR112 | placenta | embryo        | 46, XY  | 90      |
| 1560 | CS 20  | HDBR121 | placenta | embryo        | 46, XY  | 180     |
| 1574 | CS 19  | HDBR122 | placenta | embryo        | 46, XX  | 270     |
| 1579 | CS 19  | HDBR123 | skin     | embryo        | 46, XX  | 220     |
| 1586 | CS 19  | HDBR124 | skin     | embryo        | 46, XX  | 106     |
| 1568 | CS 16  | HDBR129 | placenta | embryo        | 46, XX  | 150     |
| 1621 | CS 22  | HDBR131 | skin     | head,<br>body | 46, XX  | 110     |
| 1640 | CS 22  | HDBR132 | skin     | embryo        | 46, XX  | 120     |
| 1663 | CS 15  | HDBR134 | placenta | embryo        | UNKNOWN | 400     |
| 1608 | CS 19  | HDBR135 | skin     | embryo        | 46, XX  | 270     |
| 1670 | CS 18  | HDBR136 | placenta | embryo        | 46, XX  | 180     |
| 1661 | CS 16  | HDBR137 | placenta | embryo        | 46, XY  | 270     |
| 1697 | CS 16  | HDBR138 | skin     | embryo,       | 46, XY  | 80      |
| 1698 | CS 16  | HDBR139 | skin     | embryo,       | 46, XX  | 210     |
| 1635 | CS 14  | HDBR141 | skin     | embryo        | 46, XX  | 310     |
| 1722 | CS 17  | HDBR142 | skin     | embryo,       | 46, XY  | 180     |
| 1758 | CS 17  | HDBR143 | skin     | embryo        | 46, XX  | 120     |
| 1731 | CS 17  | HDBR144 | placenta | embryo        | 46, XY  | 120     |
| 1720 | CS 16  | HDBR145 | skin     | embryo,       | 46, XX  | 180     |
| 1787 | CS 19  | HDBR146 | skin     | embryo        | 46, XX  | 150     |
| 1775 | CS 14  | HDBR147 | skin     | embryo        | UNKNOWN | 170     |
| 1826 | CS 22  | HDBR148 | placenta | head,<br>body | 46, XY  | UNKNOWN |
| 1872 | CS 22  | HDBR149 | skin     | head,<br>body | UNKNOWN | 180     |
| 1894 | CS 17  | HDBR150 | placenta | embryo        | 46, XY  | 180     |
| 1895 | CS 16  | HDBR151 | placenta | embryo        | 46, XY  | 240     |
| 1848 | CS 19  | HDBR152 | skin     | embryo        | UNKNOWN | 270     |
| 1944 | 9 pcw  | HDBR153 | skin     | brain         | 46, XY  | 270     |
| 1967 | CS 22  | HDBR154 | skin     | head,<br>body | 46, XY  | 90      |
| 1999 | CS 22  | HDBR155 | skin     | head          | 46, XY  | 120     |
| 1937 | CS 21  | HDBR156 | placenta | embryo,       | 46, XY  | UNKNOWN |
| 1972 | CS 21  | HDBR157 | skin     | embryo        | 46, XY  | 270     |
| 1979 | CS 21  | HDBR158 | skin     | embryo        | 46, XY  | 185     |
| 1929 | CS 20  | HDBR159 | skin     | embryo,       | 46, XY  | 240     |
| 1936 | CS 20  | HDBR160 | placenta | embryo,       | 46, XY  | UNKNOWN |
| 2008 | CS 18  | HDBR161 | placenta | embryo        | 46, XY  | UNKNOWN |

|      |            |         |          |                                  |         |         |
|------|------------|---------|----------|----------------------------------|---------|---------|
| 1921 | CS 17      | HDBR162 | skin     | embryo,                          | UNKNOWN | 135     |
| 1905 | CS 16      | HDBR163 | skin     | embryo                           | 46, XX  | 150     |
| 1906 | CS 16      | HDBR164 | skin     | embryo                           | 46, XY  | 240     |
| 1911 | CS 16      | HDBR165 | skin     | embryo                           | 46, XX  | 105     |
| 1913 | CS 16      | HDBR166 | skin     | embryo                           | 46, XY  | 240     |
| 1931 | CS 16      | HDBR167 | placenta | embryo,                          | 46, XY  | 180     |
| 1948 | CS 16      | HDBR168 | skin     | embryo                           | 46, XX  | 150     |
| 1962 | CS 16      | HDBR169 | skin     | embryo                           | 46, XX  | 240     |
| 1978 | CS 16      | HDBR170 | skin     | embryo                           | 46, XY  | 120     |
| 1980 | CS 16      | HDBR171 | skin     | embryo                           | 46, XY  | 270     |
| 1917 | CS 14      | HDBR172 | placenta | embryo                           | 46, XX  | 330     |
| 1964 | CS 14      | HDBR173 | skin     | embryo                           | 46, XY  | 180     |
| 1908 | 9 pcw      | HDBR174 | skin     | brain                            | 46, XY  | 120     |
| 1242 | 11 pcw     | HDBR175 | skin     | telencep<br>halon                | 46, XY  | 135     |
| 1246 | CS 12      | HDBR176 | placenta | embryo                           | 46, XY  | 110     |
| 1317 | 10 pcw     | HDBR177 | skin     | telencep<br>halon<br>hindbrain   | UNKNOWN | 1080    |
| 1318 | 11 pcw     | HDBR178 | skin     | telencep<br>halon                | 46, XX  | UNKNOWN |
| 1333 | 11 pcw     | HDBR179 | skin     | telencep<br>halon                | 46, XX  | 60      |
| 1430 | 13 pcw     | HDBR180 | skin     | cortex                           | 46, XY  | 120     |
| 1492 | 11 pcw     | HDBR182 | skin     | cortex                           | 46, XX  | 150     |
| 1493 | 13 pcw     | HDBR183 | skin     | cortex                           | 46, XY  | 240     |
| 1552 | 10 pcw     | HDBR185 | skin     | cortex                           | 46, XY  | 135     |
| 1565 | 11 pcw     | HDBR186 | skin     | cortex,<br>cerebellu<br>m        | 46, XY  | 120     |
| 1578 | CS 15      | HDBR187 | skin     | embryo                           | 46, XX  | 230     |
| 1610 | Late 8 pcw | HDBR188 | placenta | head,<br>body                    | 46, XX  | 160     |
| 1611 | Late 8 pcw | HDBR189 | placenta | head,<br>body                    | 46, XY  | 37      |
| 1650 | 12 pcw     | HDBR190 | skin     | cortex                           | 46, XX  | 170     |
| 1665 | 11 pcw     | HDBR191 | skin     | cortex                           | 46, XX  | 150     |
| 1666 | 9 pcw      | HDBR192 | skin     | head                             | 46, XX  | 180     |
| 1729 | Late 8 pcw | HDBR193 | skin     | head,<br>body                    | 46, XX  | 150     |
| 1829 | 12 pcw     | HDBR194 | placenta | embryo                           | 46, XY  | 120     |
| 1868 | Late 8 pcw | HDBR195 | skin     | head                             | UNKNOWN | 180     |
| 1889 | Late 8 pcw | HDBR196 | skin     | brain (no<br>olfactory<br>bulbs) | 46, XX  | UNKNOWN |

|       |            |         |          |                                          |         |         |
|-------|------------|---------|----------|------------------------------------------|---------|---------|
| 1893  | 9 pcw      | HDBR197 | skin     | forebrain<br>,<br>midbrain,<br>hindbrain | 46, XY  | 120     |
| 1916  | Late 8 pcw | HDBR198 | skin     | head,<br>body                            | 46, XY  | 300     |
| 1946  | 11 pcw     | HDBR199 | skin     | cortex                                   | 46, XY  | 1380    |
| 1949  | CS 20      | HDBR200 | skin     | embryo                                   | UNKNOWN | 90      |
| 1950  | Late 8 pcw | HDBR201 | skin     | head,<br>body                            | UNKNOWN | 110     |
| 1966  | 11 pcw     | HDBR202 | skin     | cortex                                   | 46, XY  | 180     |
| 1987  | Late 8 pcw | HDBR203 | skin     | head,<br>body                            | 46, XX  | 60      |
| 2172  | 12 pcw     | HDBR204 | skin     | cortex,<br>hindbrain                     | 46, XY  | 185     |
| 2173  | 12 pcw     | HDBR205 | skin     | cortex,<br>cerebellu<br>m                | 46, XX  | 210     |
| 2184  | Late 8 pcw | HDBR206 | skin     | head,<br>body                            | 46, XY  | 600     |
| 2185  | Late 8 pcw | HDBR207 | skin     | head,<br>body                            | 46, XY  | 600     |
| 2198  | 9 pcw      | HDBR208 | skin     | head                                     | 46, XY  | 100     |
| 2015  | CS 20      | HDBR209 | placenta | embryo                                   | 46, XY  | 240     |
| 2036  | 10 pcw     | HDBR210 | skin     | cortex                                   | 46, XX  | 140     |
| 2037  | 13 pcw     | HDBR211 | skin     | cortex                                   | 46, XY  | 160     |
| 2045  | 13 pcw     | HDBR212 | skin     | cortex                                   | 46, XX  | 120     |
| 2046  | 10 pcw     | HDBR213 | skin     | cortex                                   | 46, XX  | 180     |
| 2051  | CS 20      | HDBR214 | placenta | embryo                                   | 46, XX  | 1170    |
| 2064  | Late 8 pcw | HDBR215 | skin     | head,<br>body                            | 46, XY  | 1380    |
| 11631 | Late 8 pcw | HDBR216 | skin     | head                                     | 46, XY  | UNKNOWN |
| 11680 | Late 8 pcw | HDBR217 | skin     | head,<br>body                            | 46, XY  | UNKNOWN |
| 11705 | Late 8 pcw | HDBR218 | skin     | head,<br>body                            | 46, XY  | 1200    |
| 11719 | Late 8 pcw | HDBR219 | skin     | head,<br>body                            | 46, XX  | 120     |
| 1675  | 13 pcw     | HDBR220 | skin     | cortex                                   | 46, XY  | 210     |
| 2038  | CS 17      | HDBR221 | skin     | embryo                                   | 46, XX  | 245     |
| 2041  | CS 16      | HDBR222 | placenta | embryo                                   | 46, XX  | 90      |
| 2090  | CS 17      | HDBR223 | placenta | embryo                                   | 46, XX  | 130     |
| 2127  | CS 21      | HDBR224 | placenta | embryo                                   | 46, XX  | UNKNOWN |
| 2129  | CS 21      | HDBR225 | placenta | embryo                                   | 46, XY  | 120     |
| 2130  | CS 16      | HDBR226 | skin     | embryo                                   | 46, XY  | 105     |

|       |        |         |          |                                   |         |         |
|-------|--------|---------|----------|-----------------------------------|---------|---------|
| 2177  | 10 pcw | HDBR227 | skin     | cortex,<br>hindbrain              | UNKNOWN | 90      |
| 2178  | CS 21  | HDBR228 | skin     | embryo                            | 46, XY  | 175     |
| 2187  | CS 19  | HDBR229 | skin     | embryo                            | 46, XY  | 210     |
| 2181  | CS 22  | HDBR230 | skin     | embryo                            | 46, XY  | 60      |
| 11682 | CS 23  | HDBR231 | skin     | head                              | 46, XY  | 90      |
| 11717 | CS 22  | HDBR232 | skin     | head,<br>body                     | 46, XX  | 130     |
| 11762 | 10 pcw | HDBR233 | skin     | cortex,<br>midbrain,<br>hindbrain | 46, XY  | UNKNOWN |
| 11670 | CS 23  | HDBR234 | placenta | head,<br>body                     | 46, XY  | 90      |
| 11649 | CS 23  | HDBR235 | skin     | head,<br>body                     | 46, XY  | 90      |
| 11608 | CS 23  | HDBR236 | skin     | brain                             | 46, XY  | UNKNOWN |
| 1449  | CS 13  | HDBR237 | placenta | embryo                            | 46, XY  | 240     |
| 1481  | 9 pcw  | HDBR238 | skin     | cortex                            | 46, XX  | 125     |
| 1513  | 11 pcw | HDBR240 | skin     | cortex                            | 46, XY  | 240     |
| 1575  | CS 13  | HDBR241 | placenta | embryo                            | 46, XY  | 200     |
| 11700 | 9 pcw  | HDBR242 | skin     | brain                             | 46, XY  | UNKNOWN |
| 1563  | CS 13  | HDBR243 | placenta | embryo                            | 46, XX  | 180     |
| 1617  | CS 23  | HDBR244 | skin     | head,<br>body                     | 46, XY  | 190     |
| 1724  | 12 pcw | HDBR245 | skin     | cortex                            | 46, XX  | 85      |
| 1744  | CS 23  | HDBR246 | skin     | head,<br>body                     | 46, XY  | 300     |
| 1745  | CS 23  | HDBR247 | skin     | head,<br>body                     | 46, XX  | 180     |
| 1786  | CS 22  | HDBR248 | skin     | embryo                            | 46, XX  | 174     |
| 1777  | CS 23  | HDBR249 | skin     | head,<br>body                     | 46, XY  | 120     |
| 1918  | CS 23  | HDBR250 | placenta | head,<br>body                     | 46, XY  | 450     |
| 11867 | CS17   | HDBR901 | placenta | embryo                            | 46, XY  | UNKNOWN |
| 11674 | CS12   | HDBR902 | UNKNOWN  | embryo                            | 46, XX  | 80      |
| 11913 | 9 pcw  | HDBR903 | placenta | head,<br>body                     | 46, XX  | 720     |
| 11723 | CS21   | HDBR904 | UNKNOWN  | embryo                            | 46, XY  | 120     |
| 2195  | CS14   | HDBR905 | UNKNOWN  | embryo                            | 46, XX  | 210     |
| 11712 | CS21   | HDBR906 | placenta | embryo                            | 46, XY  | 120     |
| 11735 | CS15   | HDBR907 | placenta | embryo                            | 46, XY  | 180     |
