# Supplementary material for: HDBR Expression: A Unique Resource for Global and Individual Gene Expression Studies during Early Human Brain Development
Source: PubMed Central journal article supplement (PMC5080337; doi:10.3389/fnana.2016.00086), 2016-10-26
Supplement: Table3.pdf [file Table3.pdf]

Supplementary Table 3

**Top 200 genes differentially  
expressed between 9-12 PCW**

Top 200 protein coding genes that are differentially expressed between 9PCW and 12 PCW with the lowest p value (fold change >2)

| Gene Symbol | Log 2 fold   | P adjusted |
|-------------|--------------|------------|
| HDHD1       | 1.036406213  | 2.82E-39   |
| DYNC111     | -1.937347079 | 5.30E-38   |
| BCAS1       | -4.21646826  | 1.62E-31   |
| RASL10A     | -3.855068264 | 1.07E-30   |
| CIDEA       | -4.035745122 | 2.63E-28   |
| LIN28B      | 2.865437872  | 9.06E-28   |
| PSTPIP2     | 1.247049312  | 9.06E-28   |
| TMOD1       | -2.903499997 | 9.06E-28   |
| SCD5        | -1.419099014 | 1.08E-27   |
| MAFF        | -1.654376105 | 1.51E-27   |
| HTR1A       | -3.810910701 | 3.03E-26   |
| HSPA6       | -4.789756785 | 3.03E-26   |
| SLCO1C1     | -3.035869614 | 6.57E-26   |
| GPX3        | -3.330593594 | 2.99E-25   |
| ZNF658      | 1.03244712   | 5.36E-25   |
| ACY3        | -2.991134193 | 1.01E-24   |
| LARGE       | -1.23692116  | 1.05E-24   |
| TMEM74      | -1.359305117 | 2.67E-24   |
| STARD5      | -1.687079232 | 4.96E-24   |
| HIF3A       | 1.596976634  | 1.06E-23   |
| SERPINE1    | -2.320634042 | 1.09E-23   |
| LIMCH1      | -1.872800611 | 1.41E-23   |
| NDRG1       | -2.002482897 | 5.40E-23   |
| NUDT13      | 1.244054419  | 2.66E-22   |
| GADD45B     | -2.461291738 | 1.15E-21   |
| WASF1       | -1.504638348 | 1.22E-21   |
| HSPA1A      | -3.059663682 | 2.62E-21   |
| CYR61       | -1.886434695 | 3.33E-21   |
| LPL         | -2.473995173 | 4.36E-21   |
| PTPRQ       | 4.295245357  | 1.47E-20   |
| CRYM        | -3.163538495 | 1.81E-20   |
| DUSP1       | -1.129791759 | 4.16E-20   |
| KCTD12      | -1.68006269  | 9.15E-20   |
| ITGB5       | -2.797474446 | 9.37E-20   |
| SRSF6       | 1.0743457    | 9.58E-20   |
| RGS6        | -2.422529019 | 1.04E-19   |
| NHS         | 1.846459295  | 1.10E-19   |
| NDST4       | 2.446380774  | 3.46E-19   |
| SLC35F2     | -2.327910539 | 3.68E-19   |
| EDN1        | -1.383276716 | 4.45E-19   |
| TMEM108     | -1.628263585 | 4.88E-19   |

|          |              |          |
|----------|--------------|----------|
| HS3ST4   | -2.048937259 | 1.22E-18 |
| INHBA    | -3.050150611 | 1.22E-18 |
| TTLL2    | -2.705766923 | 1.66E-18 |
| TMEM159  | -1.438084747 | 4.96E-18 |
| C1orf95  | -1.919960968 | 1.35E-17 |
| GAB2     | -1.377893767 | 1.60E-17 |
| APIP     | 1.141853264  | 1.83E-17 |
| ATP2C2   | -2.685291763 | 1.83E-17 |
| SYTL4    | 1.118449158  | 1.97E-17 |
| FAM110B  | -1.029880659 | 1.99E-17 |
| DIRAS3   | 2.436985305  | 4.15E-17 |
| SEMA7A   | -1.925202754 | 5.50E-17 |
| HSPA1B   | -2.63453646  | 7.49E-17 |
| FAM149A  | -1.098434915 | 7.64E-17 |
| OTOR     | -3.637188584 | 8.39E-17 |
| KRT31    | -4.120775404 | 1.52E-16 |
| DDIT4    | -1.599122088 | 2.31E-16 |
| FLRT1    | -1.381080465 | 2.36E-16 |
| NCK2     | -1.084683862 | 2.37E-16 |
| SCN11A   | 1.181506407  | 3.04E-16 |
| ADAMTS5  | 2.108111086  | 3.19E-16 |
| CCNJ     | 1.059928847  | 4.60E-16 |
| ADM      | -1.716435374 | 5.53E-16 |
| SV2C     | 2.546574702  | 8.47E-16 |
| FAM227A  | 1.09627181   | 9.40E-16 |
| SLC26A2  | 1.146537114  | 9.80E-16 |
| TBC1D8B  | 1.637220293  | 1.04E-15 |
| AGAP1    | -1.422589131 | 1.04E-15 |
| CRYGS    | 1.282597393  | 1.54E-15 |
| HTR2B    | -2.826589998 | 1.82E-15 |
| EYA2     | 2.308299509  | 1.86E-15 |
| TPH1     | 1.646422971  | 2.41E-15 |
| SIK1     | -1.333134736 | 2.51E-15 |
| SH2D2A   | -1.931472479 | 2.52E-15 |
| SOWAHB   | -1.960087246 | 2.52E-15 |
| KRT34    | -4.016801799 | 2.53E-15 |
| LDB2     | -1.390108841 | 4.38E-15 |
| ACRC     | 1.342084915  | 5.56E-15 |
| SPINK5   | 3.144914762  | 9.09E-15 |
| C3       | -1.58772598  | 1.07E-14 |
| PHLDB2   | 1.625391163  | 1.17E-14 |
| AHNAK2   | -1.357824211 | 1.24E-14 |
| CCDC173  | 1.480312709  | 1.63E-14 |
| ADAMTSL1 | -1.768522459 | 1.63E-14 |
| JUN      | -1.651705159 | 1.81E-14 |
| SLC9C2   | 1.337764398  | 1.93E-14 |
| ENOSF1   | 1.812963208  | 2.11E-14 |
| IGSF3    | -1.171048211 | 2.35E-14 |
| B3GALT2  | -1.337461195 | 2.46E-14 |

|                 |              |          |
|-----------------|--------------|----------|
| MAT2A           | 1.07080628   | 2.62E-14 |
| SYT10           | 2.253876006  | 3.09E-14 |
| TDRD7           | -1.166108991 | 3.12E-14 |
| GRM3            | -1.733214717 | 3.81E-14 |
| SOBP            | -1.624788977 | 4.00E-14 |
| PRSS23          | -1.15678247  | 5.01E-14 |
| NR4A2           | -1.959099345 | 8.01E-14 |
| CLCN5           | 1.531298943  | 8.07E-14 |
| APLN            | -1.353922846 | 9.11E-14 |
| PLCH1           | 1.243028579  | 9.36E-14 |
| DDX26B          | 1.187741516  | 1.01E-13 |
| HMGA2           | 2.42882644   | 1.02E-13 |
| GABRP           | 2.086788024  | 1.04E-13 |
| IL27RA          | -1.582028049 | 1.16E-13 |
| PDZD7           | -1.646697369 | 1.46E-13 |
| ME3             | -1.058124764 | 1.77E-13 |
| LYPD5           | -1.054422089 | 1.81E-13 |
| FAM101B         | -1.518205101 | 1.96E-13 |
| CCND1           | 1.97263006   | 2.26E-13 |
| ANKHD1-EIF4EBP3 | 1.327599442  | 2.30E-13 |
| GPR50           | 2.855073641  | 2.54E-13 |
| RTN4RL1         | -1.75920198  | 2.61E-13 |
| MAPT            | -1.721959135 | 2.69E-13 |
| SCNN1G          | -2.124410007 | 2.84E-13 |
| TUBB2B          | -1.085178153 | 3.69E-13 |
| SMOC1           | -1.739225078 | 5.08E-13 |
| MMRN1           | 1.594108018  | 5.50E-13 |
| CHRM5           | -3.135105025 | 5.69E-13 |
| CCL3            | -2.567332649 | 6.32E-13 |
| GABRE           | 1.62782374   | 6.35E-13 |
| ATP1A1          | -1.014127683 | 7.83E-13 |
| KIF26B          | -2.026416883 | 8.34E-13 |
| NXPH3           | -2.421847619 | 8.38E-13 |
| PPFIBP2         | -1.125915165 | 8.59E-13 |
| LRP5L           | -1.336537205 | 9.75E-13 |
| PTGDR2          | -2.128118729 | 1.10E-12 |
| TLR3            | -1.586177556 | 1.13E-12 |
| CASP1           | -1.684565373 | 1.14E-12 |
| MTUS2           | -1.385670095 | 1.24E-12 |
| ZNF730          | 1.537212974  | 1.30E-12 |
| CCL3L3          | -2.770310379 | 1.31E-12 |
| SH3KBP1         | -1.073934725 | 1.40E-12 |
| ASTN2           | -1.752090772 | 1.48E-12 |
| ERICH5          | -2.323898407 | 1.50E-12 |
| RND1            | -1.248056037 | 1.52E-12 |
| TRIM67          | -1.509887841 | 1.56E-12 |
| TAP1            | -1.955396556 | 1.69E-12 |
| MAP3K15         | -1.399503664 | 1.84E-12 |

|          |        |              |          |
|----------|--------|--------------|----------|
| PLAG1    |        | 1.794090145  | 1.89E-12 |
| IFI44L   |        | 2.000428647  | 1.98E-12 |
| NODAL    |        | -1.414278922 | 2.12E-12 |
| FPR1     |        | -1.769487583 | 2.37E-12 |
| FAP      |        | 2.747006322  | 2.43E-12 |
| TMEM178A |        | -1.246773516 | 2.45E-12 |
| HLA-C    |        | -2.045282181 | 2.45E-12 |
| FOS      |        | -1.882460041 | 2.51E-12 |
| NELL2    |        | -1.116779016 | 2.60E-12 |
| SLA      |        | -1.675145546 | 2.71E-12 |
| STMN4    |        | -1.557584041 | 2.81E-12 |
| KIAA1217 |        | 1.645829508  | 2.93E-12 |
| SHISA9   |        | -1.881593626 | 2.96E-12 |
| B3GALT5  |        | 1.466806477  | 3.30E-12 |
| ADRB1    |        | -2.487501461 | 3.30E-12 |
| ADD3     |        | 1.280180859  | 3.37E-12 |
| UBE2QL1  |        | -1.571338991 | 3.78E-12 |
| GDPD5    |        | -1.746077869 | 4.64E-12 |
| KCNK9    |        | -2.243579859 | 5.13E-12 |
| SLC25A25 |        | -1.113362558 | 5.14E-12 |
| ZC3H12C  |        | 1.233895254  | 5.18E-12 |
| LCOR     |        | 1.131537186  | 5.21E-12 |
|          | Mar-03 | -1.599489806 | 5.21E-12 |
| TSHZ3    |        | -1.868857349 | 5.63E-12 |
| CNTNAP2  |        | 1.526591651  | 6.29E-12 |
| LGALS3   |        | -1.9403598   | 6.29E-12 |
| KRT33B   |        | -3.500151694 | 7.06E-12 |
| IGF2BP1  |        | 1.22902062   | 7.90E-12 |
| CSF1R    |        | -1.576729901 | 8.05E-12 |
| MYL4     |        | -2.189925097 | 8.78E-12 |
| RHCG     |        | -1.932235479 | 9.03E-12 |
| LHX9     |        | 2.101447191  | 1.04E-11 |
| RNF113A  |        | -1.263894342 | 1.05E-11 |
| MGAM     |        | 1.461266409  | 1.15E-11 |
| FAM196A  |        | -1.568621365 | 1.21E-11 |
| HEPACAM  |        | -2.879262838 | 1.23E-11 |
| HMG5     |        | 1.349115257  | 1.36E-11 |
| PCDH11Y  |        | -2.10475491  | 1.49E-11 |
| L1TD1    |        | 1.943111035  | 1.62E-11 |
| LARP6    |        | -1.005320705 | 1.85E-11 |
| TRIM66   |        | 1.499279415  | 2.17E-11 |
| CCDC14   |        | 1.120656137  | 2.28E-11 |
| EVA1C    |        | -1.86785476  | 2.37E-11 |
| NKX2-2   |        | -2.144896738 | 2.63E-11 |
| DSEL     |        | -1.346588268 | 2.80E-11 |
| ALS2CR12 |        | 1.190349976  | 3.10E-11 |
| HHIPL1   |        | -1.108253586 | 3.12E-11 |
| CLMN     |        | 1.575820013  | 4.11E-11 |
| KLHL31   |        | 1.444083098  | 4.14E-11 |

|          |              |          |
|----------|--------------|----------|
| SEMA3C   | -1.279306443 | 4.23E-11 |
| PIK3CD   | -1.220634494 | 4.98E-11 |
| ADAMTS19 | 1.768334633  | 5.35E-11 |
| CMTR2    | 1.035337739  | 5.61E-11 |
| TEX15    | 1.764082704  | 6.25E-11 |
| HLA-B    | -1.760599387 | 6.25E-11 |
| ABCC2    | 1.262102656  | 6.58E-11 |
| ZNF518A  | 1.074205262  | 7.37E-11 |
| AOAH     | -1.187621733 | 7.98E-11 |
| SELPLG   | -1.517286364 | 8.64E-11 |
| CDC42EP1 | -2.173740896 | 8.70E-11 |
| FOSL2    | -2.080639434 | 8.87E-11 |
| PDXK     | -1.166511554 | 9.17E-11 |

Top 200 protein coding genes that are differentially expressed between 9PCW and 12 PCW - with the highest fold change (p adjusted <0.05)

| Gene Name | Log 2 fold | P adjusted |
|-----------|------------|------------|
| HSPA6     | 4.789757   | 3.03E-26   |
| PTPRQ     | 4.295245   | 1.47E-20   |
| BCAS1     | 4.216468   | 1.62E-31   |
| KRT31     | 4.120775   | 1.52E-16   |
| CIDEA     | 4.035745   | 2.63E-28   |
| KRT34     | 4.016802   | 2.53E-15   |
| RASL10A   | 3.855068   | 1.07E-30   |
| HTR1A     | 3.810911   | 3.03E-26   |
| OTOR      | 3.637189   | 8.39E-17   |
| KRT33B    | 3.500152   | 7.06E-12   |
| ZFP57     | 3.47717    | 1.09E-10   |
| GPX3      | 3.330594   | 2.99E-25   |
| AQP4      | 3.253096   | 1.20E-10   |
| CRYM      | 3.163538   | 1.81E-20   |
| KRT33A    | 3.152875   | 1.38E-08   |
| SPINK5    | 3.144915   | 9.09E-15   |
| CHRM5     | 3.135105   | 5.69E-13   |
| HSPA1A    | 3.059664   | 2.62E-21   |
| INHBA     | 3.050151   | 1.22E-18   |
| SLCO1C1   | 3.03587    | 6.57E-26   |
| ACY3      | 2.991134   | 1.01E-24   |
| DEFB112   | 2.978308   | 3.62E-09   |
| TMOD1     | 2.9035     | 9.06E-28   |
| HEPACAM   | 2.879263   | 1.23E-11   |
| LIN28B    | 2.865438   | 9.06E-28   |
| GPR50     | 2.855074   | 2.54E-13   |
| HTR2B     | 2.82659    | 1.82E-15   |
| KRT19     | 2.815798   | 2.40E-10   |

|             |          |          |
|-------------|----------|----------|
| ITGB5       | 2.797474 | 9.37E-20 |
| CCL3L3      | 2.77031  | 1.31E-12 |
| MAG         | 2.761447 | 2.88E-07 |
| FAP         | 2.747006 | 2.43E-12 |
| CD2         | 2.731503 | 1.17E-06 |
| DAZ2        | 2.726465 | 1.52E-06 |
| TTLL2       | 2.705767 | 1.66E-18 |
| ATP2C2      | 2.685292 | 1.83E-17 |
| HSPA1B      | 2.634536 | 7.49E-17 |
| C3orf80     | 2.609697 | 1.12E-08 |
| DAZ1        | 2.59296  | 5.87E-06 |
| TAAR9       | 2.582372 | 3.56E-07 |
| CCL3        | 2.567333 | 6.32E-13 |
| SV2C        | 2.546575 | 8.47E-16 |
| OSM         | 2.504266 | 1.57E-10 |
| TMC3        | 2.501266 | 4.65E-07 |
| DAZ3        | 2.492306 | 1.46E-05 |
| ADRB1       | 2.487501 | 3.30E-12 |
| LPL         | 2.473995 | 4.36E-21 |
| CRYAB       | 2.46982  | 2.14E-06 |
| EBF2        | 2.463912 | 3.90E-10 |
| GADD45B     | 2.461292 | 1.15E-21 |
| ADIRF       | 2.455737 | 1.65E-05 |
| NDST4       | 2.446381 | 3.46E-19 |
| GPR17       | 2.437764 | 1.42E-08 |
| DIRAS3      | 2.436985 | 4.15E-17 |
| HMGA2       | 2.428826 | 1.02E-13 |
| RAMP3       | 2.42796  | 8.47E-08 |
| RGS6        | 2.422529 | 1.04E-19 |
| NXPH3       | 2.421848 | 8.38E-13 |
| OSTN        | 2.416467 | 6.48E-10 |
| HTR3A       | 2.411307 | 6.04E-07 |
| FA2H        | 2.377963 | 1.42E-06 |
| VSX1        | 2.340006 | 2.52E-09 |
| IL12RB2     | 2.329874 | 1.84E-06 |
| SLC35F2     | 2.327911 | 3.68E-19 |
| ERICH5      | 2.323898 | 1.50E-12 |
| SERPINE1    | 2.320634 | 1.09E-23 |
| EYA2        | 2.3083   | 1.86E-15 |
| AGT         | 2.304714 | 3.84E-05 |
| SULT1E1     | 2.303907 | 1.10E-08 |
| PAPLN       | 2.292464 | 1.24E-10 |
| KRT13       | 2.287289 | 1.40E-06 |
| SYT10       | 2.253876 | 3.09E-14 |
| KCNK9       | 2.24358  | 5.13E-12 |
| FGF10       | 2.241131 | 9.40E-06 |
| IQCJ-SCHIP1 | 2.221233 | 2.64E-07 |
| CH25H       | 2.220792 | 1.28E-08 |
| UNCX        | 2.20735  | 5.48E-07 |

|          |          |             |
|----------|----------|-------------|
| MYL4     | 2.189925 | 8.78E-12    |
| TNC      | 2.184324 | 4.14E-09    |
| MOG      | 2.183881 | 1.41E-06    |
| SULT1C2  | 2.181035 | 1.23E-05    |
| TBX21    | 2.180791 | 0.000171936 |
| FAM163A  | 2.174863 | 6.15E-07    |
| CDC42EP1 | 2.173741 | 8.70E-11    |
| LCE5A    | 2.163304 | 8.22E-05    |
| MT1M     | 2.157847 | 1.39E-05    |
| SLN      | 2.148791 | 5.89E-09    |
| NKX2-2   | 2.144897 | 2.63E-11    |
| FRMPD4   | 2.139676 | 9.74E-10    |
| ARHGAP36 | 2.137153 | 6.11E-07    |
| PTGDR2   | 2.128119 | 1.10E-12    |
| SCNN1G   | 2.12441  | 2.84E-13    |
| TMEM102  | 2.111661 | 3.40E-09    |
| SIX2     | 2.110486 | 0.000181156 |
| BBOX1    | 2.108356 | 4.57E-05    |
| ADAMTS5  | 2.108111 | 3.19E-16    |
| KRT32    | 2.108022 | 0.000174529 |
| PCDH11Y  | 2.104755 | 1.49E-11    |
| LHX9     | 2.101447 | 1.04E-11    |
| SPRR2D   | 2.095641 | 0.000265192 |
| TLR2     | 2.095366 | 1.79E-08    |
| CRYGC    | 2.093131 | 6.55E-05    |
| GABRP    | 2.086788 | 1.04E-13    |
| SIX1     | 2.086667 | 2.12E-05    |
| FOSL2    | 2.080639 | 8.87E-11    |
| GLRA2    | 2.079189 | 3.01E-10    |
| HAPLN4   | 2.07628  | 3.44E-05    |
| SATB2    | 2.070723 | 3.07E-08    |
| CLDN23   | 2.068993 | 3.19E-06    |
| BNC2     | 2.064444 | 5.30E-06    |
| HS3ST4   | 2.048937 | 1.22E-18    |
| F11      | 2.045579 | 0.000317099 |
| HLA-C    | 2.045282 | 2.45E-12    |
| HRH2     | 2.04192  | 2.28E-10    |
| LIX1     | 2.03841  | 3.79E-10    |
| FFAR3    | 2.037553 | 0.000357933 |
| FRMD7    | 2.035523 | 0.000139582 |
| CDH7     | 2.0326   | 1.15E-07    |
| DCDC2C   | 2.0304   | 5.24E-05    |
| KIF26B   | 2.026417 | 8.34E-13    |
| DMRTB1   | 2.024068 | 0.000209034 |
| ZFP42    | 2.02342  | 0.000313891 |
| DEFA1B   | 2.023142 | 0.000528869 |
| C10orf82 | 2.021508 | 6.39E-09    |
| GPAT2    | 2.018198 | 2.67E-07    |
| NDRG1    | 2.002483 | 5.40E-23    |

|            |          |             |
|------------|----------|-------------|
| PSMB9      | 2.00132  | 7.43E-06    |
| IFI44L     | 2.000429 | 1.98E-12    |
| TUBA3D     | 1.996973 | 0.000448678 |
| AC011155.1 | 1.990526 | 4.30E-06    |
| LMX1B      | 1.990156 | 0.000515944 |
| DLK1       | 1.983053 | 6.65E-05    |
| WFDC1      | 1.975597 | 3.88E-06    |
| CCND1      | 1.97263  | 2.26E-13    |
| RPRM       | 1.964752 | 6.11E-10    |
| SOWAHB     | 1.960087 | 2.52E-15    |
| NR4A2      | 1.959099 | 8.01E-14    |
| HSPA12A    | 1.95812  | 3.17E-08    |
| TAP1       | 1.955397 | 1.69E-12    |
| GSTM1      | 1.951048 | 1.80E-09    |
| L1TD1      | 1.943111 | 1.62E-11    |
| OTOL1      | 1.941835 | 0.001051675 |
| LGALS3     | 1.94036  | 6.29E-12    |
| DYNC111    | 1.937347 | 5.30E-38    |
| GADL1      | 1.936371 | 7.55E-05    |
| RHCG       | 1.932235 | 9.03E-12    |
| SH2D2A     | 1.931472 | 2.52E-15    |
| CFH        | 1.926696 | 6.22E-06    |
| SEMA7A     | 1.925203 | 5.50E-17    |
| OLAH       | 1.923195 | 1.90E-05    |
| LCN2       | 1.922863 | 0.00033607  |
| HKDC1      | 1.921033 | 1.51E-08    |
| CSF3       | 1.920389 | 0.000116954 |
| C1orf95    | 1.919961 | 1.35E-17    |
| C6orf141   | 1.911174 | 1.68E-05    |
| MPZL2      | 1.9057   | 0.000800295 |
| RXRG       | 1.90109  | 0.000385838 |
| NAPRT      | 1.892101 | 1.11E-06    |
| C2CD4B     | 1.891664 | 3.65E-10    |
| MYH4       | 1.889875 | 0.000391397 |
| SLC44A4    | 1.889602 | 1.45E-05    |
| CYR61      | 1.886435 | 3.33E-21    |
| FOS        | 1.88246  | 2.51E-12    |
| SHISA9     | 1.881594 | 2.96E-12    |
| NEFM       | 1.880194 | 5.71E-08    |
| CRABP1     | 1.880164 | 5.96E-06    |
| GFY        | 1.872993 | 1.68E-05    |
| LIMCH1     | 1.872801 | 1.41E-23    |
| TSHZ3      | 1.868857 | 5.63E-12    |
| EVA1C      | 1.867855 | 2.37E-11    |
| GOS2       | 1.855041 | 0.00051163  |
| PRPS1L1    | 1.852949 | 0.000309747 |
| LRRTM1     | 1.851177 | 6.78E-08    |
| NHS        | 1.846459 | 1.10E-19    |
| OR5M8      | 1.842173 | 0.001093831 |

|         |          |             |
|---------|----------|-------------|
| OGN     | 1.841665 | 0.00186276  |
| LEF1    | 1.839851 | 1.13E-09    |
| DEFB110 | 1.83813  | 0.001796698 |
| VHLL    | 1.83707  | 9.53E-06    |
| COL6A3  | 1.833995 | 0.000999464 |
| HGF     | 1.829095 | 1.08E-08    |
| SCRG1   | 1.826111 | 3.58E-06    |
| FRMPD2  | 1.821707 | 6.45E-05    |
| C8orf34 | 1.81811  | 7.08E-10    |
| ENOSF1  | 1.812963 | 2.11E-14    |
| TSHZ2   | 1.808606 | 1.73E-05    |
| LUM     | 1.805274 | 6.89E-05    |
| TAS2R10 | 1.80082  | 2.14E-09    |
| GPR64   | 1.796264 | 2.82E-05    |
| HSPB1   | 1.795849 | 1.37E-05    |
| PLAG1   | 1.79409  | 1.89E-12    |
| SALL4   | 1.788668 | 5.73E-10    |
| DNAJB1  | 1.784406 | 3.05E-10    |
| C7      | 1.780551 | 0.001501459 |
| PLD4    | 1.780056 | 2.83E-10    |
| CPNE8   | 1.779081 | 3.57E-05    |
| DEFA3   | 1.776043 | 0.002779504 |
| CPLX1   | 1.775468 | 8.61E-08    |
| TRPC6   | 1.769692 | 7.25E-08    |
| FPR1    | 1.769488 | 2.37E-12    |

81 genes that are present in both the highest fold change and lowest p value lists

| Gene Symbol | Log 2 fold   | P adjusted |
|-------------|--------------|------------|
| ACY3        | 2.991134193  | 1.01E-24   |
| ADAMTS5     | -2.108111086 | 3.19E-16   |
| ADRB1       | 2.487501461  | 3.30E-12   |
| ATP2C2      | 2.685291763  | 1.83E-17   |
| BCAS1       | 4.21646826   | 1.62E-31   |
| C1orf95     | 1.919960968  | 1.35E-17   |
| CCL3        | 2.567332649  | 6.32E-13   |
| CCL3L3      | 2.770310379  | 1.31E-12   |
| CCND1       | -1.97263006  | 2.26E-13   |
| CDC42EP1    | 2.173740896  | 8.70E-11   |
| CHRM5       | 3.135105025  | 5.69E-13   |
| CIDEA       | 4.035745122  | 2.63E-28   |
| CRYM        | 3.163538495  | 1.81E-20   |
| CYR61       | 1.886434695  | 3.33E-21   |
| DIRAS3      | -2.436985305 | 4.15E-17   |
| DYNC111     | 1.937347079  | 5.30E-38   |
| ENOSF1      | -1.812963208 | 2.11E-14   |

|         |              |          |
|---------|--------------|----------|
| ERICH5  | 2.323898407  | 1.50E-12 |
| EVA1C   | 1.86785476   | 2.37E-11 |
| EYA2    | -2.308299509 | 1.86E-15 |
| FAP     | -2.747006322 | 2.43E-12 |
| FOS     | 1.882460041  | 2.51E-12 |
| FOSL2   | 2.080639434  | 8.87E-11 |
| FPR1    | 1.769487583  | 2.37E-12 |
| GABRP   | -2.086788024 | 1.04E-13 |
| GADD45B | 2.461291738  | 1.15E-21 |
| GPR50   | -2.855073641 | 2.54E-13 |
| GPX3    | 3.330593594  | 2.99E-25 |
| HEPACAM | 2.879262838  | 1.23E-11 |
| HLA-C   | 2.045282181  | 2.45E-12 |
| HMGA2   | -2.42882644  | 1.02E-13 |
| HS3ST4  | 2.048937259  | 1.22E-18 |
| HSPA1A  | 3.059663682  | 2.62E-21 |
| HSPA1B  | 2.63453646   | 7.49E-17 |
| HSPA6   | 4.789756785  | 3.03E-26 |
| HTR1A   | 3.810910701  | 3.03E-26 |
| HTR2B   | 2.826589998  | 1.82E-15 |
| IFI44L  | -2.000428647 | 1.98E-12 |
| INHBA   | 3.050150611  | 1.22E-18 |
| ITGB5   | 2.797474446  | 9.37E-20 |
| KCNK9   | 2.243579859  | 5.13E-12 |
| KIF26B  | 2.026416883  | 8.34E-13 |
| KRT31   | 4.120775404  | 1.52E-16 |
| KRT33B  | 3.500151694  | 7.06E-12 |
| KRT34   | 4.016801799  | 2.53E-15 |
| L1TD1   | -1.943111035 | 1.62E-11 |
| LGALS3  | 1.9403598    | 6.29E-12 |
| LHX9    | -2.101447191 | 1.04E-11 |
| LIMCH1  | 1.872800611  | 1.41E-23 |
| LIN28B  | -2.865437872 | 9.06E-28 |
| LPL     | 2.473995173  | 4.36E-21 |
| MYL4    | 2.189925097  | 8.78E-12 |
| NDRG1   | 2.002482897  | 5.40E-23 |
| NDST4   | -2.446380774 | 3.46E-19 |
| NHS     | -1.846459295 | 1.10E-19 |
| NKX2-2  | 2.144896738  | 2.63E-11 |
| NR4A2   | 1.959099345  | 8.01E-14 |
| NXPH3   | 2.421847619  | 8.38E-13 |
| OTOR    | 3.637188584  | 8.39E-17 |
| PCDH11Y | 2.10475491   | 1.49E-11 |
| PLAG1   | -1.794090145 | 1.89E-12 |
| PTGDR2  | 2.128118729  | 1.10E-12 |
| PTPRQ   | -4.295245357 | 1.47E-20 |
| RASL10A | 3.855068264  | 1.07E-30 |
| RGS6    | 2.422529019  | 1.04E-19 |
| RHCG    | 1.932235479  | 9.03E-12 |

|          |              |          |
|----------|--------------|----------|
| SCNN1G   | 2.124410007  | 2.84E-13 |
| SEMA7A   | 1.925202754  | 5.50E-17 |
| SERPINE1 | 2.320634042  | 1.09E-23 |
| SH2D2A   | 1.931472479  | 2.52E-15 |
| SHISA9   | 1.881593626  | 2.96E-12 |
| SLC35F2  | 2.327910539  | 3.68E-19 |
| SLCO1C1  | 3.035869614  | 6.57E-26 |
| SOWAHB   | 1.960087246  | 2.52E-15 |
| SPINK5   | -3.144914762 | 9.09E-15 |
| SV2C     | -2.546574702 | 8.47E-16 |
| SYT10    | -2.253876006 | 3.09E-14 |
| TAP1     | 1.955396556  | 1.69E-12 |
| TMOD1    | 2.903499997  | 9.06E-28 |
| TSHZ3    | 1.868857349  | 5.63E-12 |
| TLL2     | 2.705766923  | 1.66E-18 |

Negative Log2 fold values DECREASE in expression with age.  
They are more highly expressed at 9PCW.

Positive Log2 fold values INCREASE in expression with age. They  
are more highly expressed at 12 PCW.
