# Supplementary material for: HDBR Expression: A Unique Resource for Global and Individual Gene Expression Studies during Early Human Brain Development
Source: PubMed Central journal article supplement (PMC5080337; doi:10.3389/fnana.2016.00086), 2016-10-26
Supplement: Table4.pdf [file Table4.pdf]

**Supplementary Table 4** differential expression anterior-posterior cortex

Genes that are differentially expressed between anterior and posterior cortex at 9 pcw

| <b>Gene Name</b> | <b>Log 2 fold</b> | <b>P adjusted</b> |
|------------------|-------------------|-------------------|
| ZIC3             | 3.316820934       | 4.63E-21          |
| DCT              | 3.209577832       | 5.32E-12          |
| GADL1            | 3.116578311       | 5.69E-16          |
| CYP26A1          | 3.033623659       | 3.75E-12          |
| MIR217HG         | 2.586740936       | 4.78E-08          |
| LAMP5            | 2.494707745       | 2.16E-07          |
| MYBPC1           | 2.487607005       | 2.07E-07          |
| DCHS2            | 2.465400441       | 1.16E-11          |
| AE000661.37      | 2.291916082       | 6.61E-07          |
| LRRTM3           | 2.251127881       | 1.07E-07          |
| MOXD1            | 1.972086114       | 0.000234356       |
| TRDC             | 1.926029601       | 0.000234356       |
| HKDC1            | 1.888456551       | 0.000520509       |
| ACTC1            | 1.887124989       | 0.00065774        |
| SPATA13          | 1.873128127       | 0.000218255       |
| ANKRD34B         | 1.781708416       | 0.000714798       |
| GOLGA2P5         | 1.774802282       | 7.57E-11          |
| CTD-2140G10.2    | 1.773493427       | 0.000162022       |
| OTOG             | 1.770753975       | 0.00286286        |
| KCNK9            | 1.715955148       | 2.28E-05          |
| PIP5K1B          | 1.693719647       | 4.78E-08          |
| RORB             | 1.691912163       | 3.28E-05          |
| CYP26B1          | 1.690272228       | 3.67E-05          |
| GIPR             | 1.674604017       | 0.007743684       |
| LINC00643        | 1.6541064         | 0.003310335       |
| HILS1            | 1.641858318       | 0.009556352       |
| CNIH3            | 1.637172011       | 2.68E-05          |
| FAM196B          | 1.63377138        | 0.008870445       |
| RP11-159K7.2     | 1.633666305       | 6.78E-05          |
| RLBP1            | 1.631551174       | 0.010110274       |
| CTB-12A17.2      | 1.617698181       | 2.16E-07          |
| RP11-844P9.2     | 1.615644149       | 0.000974515       |
| ARAP2            | 1.613256644       | 0.003659133       |
| HTR2A            | 1.600195345       | 0.00028881        |
| NRK              | 1.598215971       | 0.002140384       |

|               |             |             |
|---------------|-------------|-------------|
| PTER          | 1.590798504 | 8.82E-06    |
| SALL3         | 1.585766195 | 0.000187245 |
| CDH7          | 1.580273883 | 1.03E-08    |
| IL1RAPL2      | 1.565916233 | 0.017203942 |
| RP11-331K15.1 | 1.524803787 | 0.024192831 |
| SMCR2         | 1.519849323 | 0.026541759 |
| IMPA1P        | 1.519264368 | 0.005962805 |
| TEC           | 1.505161482 | 0.003384429 |
| RP1-137H15.2  | 1.503100791 | 0.028686765 |
| RCAN3         | 1.493077424 | 2.24E-07    |
| HHIP          | 1.489927198 | 0.032019824 |
| USH1C         | 1.464187669 | 0.007627456 |
| RP11-849I19.1 | 1.461171468 | 0.013848172 |
| LINC01285     | 1.45307862  | 0.022919544 |
| ETV1          | 1.444949634 | 4.28E-06    |
| ROBO1         | 1.433814992 | 1.45E-07    |
| CXXC4         | 1.418928923 | 0.008983871 |
| RP11-517P14.7 | 1.412157586 | 0.003450351 |
| SALL4         | 1.410132006 | 0.006568306 |
| LRRC9         | 1.409562211 | 0.008442412 |
| SOCS2         | 1.403587248 | 0.000520509 |
| IGSF11        | 1.402476565 | 0.000218255 |
| GRB14         | 1.400588027 | 0.007214822 |
| RIT2          | 1.394773327 | 0.014235703 |
| RP3-466P17.1  | 1.384298357 | 1.29E-06    |
| COL6A4P2      | 1.37120209  | 0.009556352 |
| PCDH17        | 1.36930736  | 0.018578223 |
| MYLK          | 1.3647404   | 0.01015303  |
| WNT3          | 1.361005614 | 6.67E-05    |
| C11orf63      | 1.347683637 | 0.02891569  |
| SLC17A6       | 1.345440183 | 0.00457877  |
| NUS1P2        | 1.344425207 | 0.007727407 |
| CCDC175       | 1.344298448 | 0.03037099  |
| C18orf42      | 1.337492654 | 0.0466742   |
| POU3F2        | 1.328316267 | 0.010029015 |
| NTN4          | 1.323537562 | 0.000234356 |
| ANKRD29       | 1.317713457 | 6.15E-07    |
| EYS           | 1.312153194 | 0.033268716 |
| FOLH1         | 1.292304635 | 1.18E-07    |
| RP11-384O8.1  | 1.291022683 | 0.035095866 |
| IGDCC4        | 1.290775688 | 1.72E-06    |
| RGAG1         | 1.288926273 | 0.000858828 |
| ZDHHC14       | 1.273409838 | 6.82E-06    |

|                    |             |             |
|--------------------|-------------|-------------|
| HOPX               | 1.268426033 | 0.036219784 |
| SYNJ2              | 1.243243967 | 0.005558463 |
| ME1                | 1.229041476 | 0.016128379 |
| VAT1L              | 1.213489668 | 0.007327158 |
| CA8                | 1.20485907  | 0.016208501 |
| PHYH               | 1.20342625  | 6.15E-07    |
| CCDC36             | 1.192401559 | 0.018773181 |
| SYNM               | 1.189627814 | 0.02935281  |
| KITLG              | 1.186059617 | 0.048343662 |
| SPAG1              | 1.165229985 | 0.019732216 |
| RP11-<br>1109F11.3 | 1.164827062 | 0.007743684 |
| KCNV1              | 1.164327401 | 0.011400965 |
| PCDH8              | 1.164217503 | 0.036219784 |
| ST8SIA3            | 1.162692981 | 0.035977285 |
| ADCY1              | 1.161217488 | 0.000206635 |
| CRNDE              | 1.161129637 | 0.00105812  |
| RHOJ               | 1.153188308 | 0.00286286  |
| LINC01152          | 1.14973179  | 0.007214822 |
| TOX                | 1.13750851  | 0.034350746 |
| NFIA-AS2           | 1.13592409  | 0.015618075 |
| NPY5R              | 1.133032484 | 0.033268716 |
| RFTN2              | 1.126468384 | 0.034119921 |
| SP8                | 1.123387038 | 0.007743684 |
| RNF125             | 1.121703665 | 0.023689998 |
| RP3-428L16.2       | 1.095433337 | 0.005410852 |
| SOCS2-AS1          | 1.08176746  | 0.014311841 |
| BCAT1              | 1.067781707 | 0.036219784 |
| TENM2              | 1.0512605   | 0.008563057 |
| PDE1C              | 1.045669936 | 2.49E-05    |
| AC068057.1         | 1.040251561 | 0.011908999 |
| AF186192.5         | 1.029889466 | 0.002269008 |
| FRK                | 1.003643089 | 0.042375124 |
| NPTX1              | -1.02672212 | 0.034350746 |
| SYN2               | -1.03067815 | 0.03466247  |
| KIAA1324           | -1.08399978 | 0.005378528 |
| FZD7               | -1.09013391 | 1.87E-07    |
| ATOH7              | -1.09187289 | 0.013848172 |
| CD27-AS1           | -1.12265269 | 4.43E-05    |
| PTPN3              | -1.18490074 | 0.002393295 |
| PPARG              | -1.2448199  | 0.000351408 |
| DPP10-AS1          | -1.2532731  | 0.01586224  |
| CNGA3              | -1.26976345 | 3.28E-05    |
| DIRAS3             | -1.27249822 | 0.006195153 |
| FBLN7              | -1.31511014 | 0.00105812  |
| MICAL2             | -1.3646685  | 0.033558184 |
| SHISA6             | -1.38131765 | 2.19E-09    |

|               |             |             |
|---------------|-------------|-------------|
| RP11-469H8.6  | -1.44220555 | 0.013848172 |
| HRK           | -1.45189445 | 0.035095866 |
| RP11-215G15.5 | -1.46059807 | 0.003659133 |
| DCLK3         | -1.46752486 | 1.32E-07    |
| ECEL1         | -1.47979885 | 0.036726237 |
| MKX           | -1.48089544 | 0.028478615 |
| CHST15        | -1.50175486 | 0.000120101 |
| SPINK5        | -1.50997083 | 0.00105812  |
| TAC3          | -1.51108222 | 0.021722228 |
| CHRNA3        | -1.53933121 | 8.82E-06    |
| NECAB1        | -1.59234887 | 0.015618075 |
| AC004862.6    | -1.61843195 | 0.002843333 |
| PDPN          | -1.67599432 | 3.25E-09    |
| CHODL         | -1.68190687 | 7.21E-06    |
| RP1-212P9.2   | -1.82140837 | 0.000267376 |
| DGKK          | -2.02929528 | 0.000234356 |
| NR2F1         | -2.38816284 | 3.77E-07    |
| CDH9          | -2.41305581 | 6.15E-07    |
| NR2F1-AS1     | -2.43072095 | 5.60E-09    |
| OCA2          | -2.68624169 | 1.08E-20    |
| MAS1          | -3.11502747 | 9.56E-24    |
| FGFR3         | -4.82759528 | 1.05E-39    |

Positive Log2 fold value is higher in the anterior cortex.

Negative Log2 fold value is higher in the posterior cortex.

Genes that are differentially expressed between anterior and posterior cortex at **12 pcw**

| Gene Name | Log 2 fold  | P adjusted  |
|-----------|-------------|-------------|
| SLC17A8   | -1.98648884 | 2.84E-05    |
| PDZRN3    | -1.80670657 | 4.56E-05    |
| GIPR      | -1.79900599 | 0.00020008  |
| RGS8      | -1.79878044 | 5.74E-05    |
| WIF1      | -1.7572201  | 4.56E-05    |
| ST8SIA5   | -1.7517511  | 5.74E-05    |
| CA8       | -1.74483807 | 0.000125193 |
| SYNDIG1L  | -1.70635595 | 0.000382599 |
| TLL1      | -1.70567259 | 0.000404269 |
| ADAM33    | -1.66330276 | 0.000382599 |
| GRIN2C    | -1.64669938 | 0.000404269 |
| MYBPHL    | -1.63505047 | 0.000382599 |

|                   |             |             |
|-------------------|-------------|-------------|
| GABRQ             | -1.61856872 | 0.000302197 |
| GRM4              | -1.61773437 | 4.56E-05    |
| BRINP2            | -1.56031888 | 0.000733991 |
| CNTN6             | -1.55483391 | 0.000738993 |
| RP11-<br>742D12.2 | -1.53757292 | 0.001974768 |
| ZBTB7C            | -1.52650847 | 0.000757096 |
| NPY5R             | -1.52610876 | 0.001127388 |
| KCNMB2            | -1.51266405 | 0.000302197 |
| LAMP5             | -1.51096481 | 0.002313725 |
| KRT19             | -1.49972027 | 0.001154186 |
| RP4-<br>555D20.2  | -1.49923158 | 0.001081937 |
| RP11-<br>13K12.1  | -1.4985507  | 0.002148024 |
| COL12A1           | -1.49485988 | 4.56E-05    |
| SLIT3             | -1.46399933 | 0.002148024 |
| LRFN2             | -1.45427915 | 0.001550305 |
| THRB              | -1.44769574 | 0.00093725  |
| UNC5C             | -1.4459131  | 0.004359524 |
| ATP5F1P5          | -1.43900707 | 0.004667426 |
| SERTM1            | -1.43867462 | 0.000302197 |
| ERBB4             | -1.40520211 | 0.002272964 |
| GPR1              | -1.40425059 | 0.00388003  |
| SCGN              | -1.40044333 | 0.003990401 |
| SLC25A45          | -1.39577583 | 0.004667426 |
| DLX6-AS1          | -1.38833688 | 0.007336626 |
| DPF3              | -1.38487038 | 0.001064948 |
| NAALAD2           | -1.38283179 | 0.001154186 |
| SPON1             | -1.37641615 | 0.008428975 |
| NPAS1             | -1.37235405 | 0.00093725  |
| PTGS2             | -1.37180351 | 0.003395648 |
| PIP5K1B           | -1.36515377 | 0.001321734 |
| ARAP2             | -1.3617944  | 0.001465728 |
| EYA1              | -1.3599742  | 0.001664042 |
| NRIP3             | -1.35825578 | 0.007162924 |
| SYNJ2             | -1.35516512 | 0.00043179  |
| ABI3BP            | -1.35207785 | 0.006096373 |
| RCAN2             | -1.35064863 | 0.001013927 |
| KCNC2             | -1.34936804 | 0.008101362 |
| KCNIP4            | -1.34702996 | 0.004359524 |
| CLDN1             | -1.34565978 | 0.008901471 |
| MDGA1             | -1.34347531 | 6.22E-06    |
| ADAMTS14          | -1.34098624 | 0.003656903 |
| ABCA1             | -1.33980358 | 0.001038083 |
| ZNF385A           | -1.33852827 | 0.00093725  |
| COLEC12           | -1.33752322 | 0.001974768 |
| KIRREL3           | -1.32776612 | 5.74E-05    |
| RARB              | -1.32568269 | 0.012219823 |

|               |             |             |
|---------------|-------------|-------------|
| C11orf63      | -1.32219587 | 0.005681219 |
| BEST4         | -1.31798197 | 0.004359524 |
| CDCP1         | -1.31387854 | 0.012993273 |
| ANXA2P2       | -1.31147607 | 0.01085732  |
| TRIM71        | -1.30893981 | 0.000652415 |
| CPNE8         | -1.30510529 | 0.012361349 |
| MGAT4C        | 1.301265076 | 0.000733991 |
| CARD10        | -1.29598947 | 0.001570893 |
| NRXN3         | -1.29295984 | 0.005648568 |
| ITPR2         | -1.28973389 | 0.000685751 |
| RPH3A         | -1.28528832 | 0.007167369 |
| KLHL4         | -1.2778529  | 0.000652415 |
| PRLHR         | -1.27775997 | 0.00595939  |
| TUNAR         | -1.27771921 | 0.012391233 |
| GPNMB         | -1.27708249 | 0.018339787 |
| RP11-796G6.1  | -1.27544126 | 0.01779328  |
| TAC1          | -1.26688581 | 0.018339787 |
| CAMK1G        | -1.26533311 | 0.008901471 |
| LGI4          | -1.26441216 | 0.003789042 |
| ALCAM         | -1.2636627  | 0.000154585 |
| RP11-679B19.1 | -1.26078352 | 0.00093725  |
| SYTL5         | -1.25964198 | 0.014099385 |
| NPY1R         | -1.25527984 | 0.002743176 |
| PLCXD3        | -1.24942163 | 0.005408338 |
| VWA5B1        | -1.24878462 | 0.008101362 |
| GAD1          | -1.24767674 | 0.014099385 |
| UST           | -1.23692034 | 0.007187283 |
| SLC32A1       | -1.23381733 | 0.02207139  |
| GHR           | -1.23335349 | 0.00041953  |
| YPEL2         | -1.23101397 | 0.005648568 |
| AE000661.37   | -1.22904233 | 0.025233298 |
| GRM7          | -1.22778605 | 0.022323189 |
| TBX21         | -1.22760534 | 0.016841981 |
| DLX1          | -1.22638145 | 0.023500504 |
| BCYRN1        | -1.21380067 | 0.018339787 |
| ADARB2        | -1.21282483 | 0.018683871 |
| FBLN5         | -1.21164866 | 0.028460906 |
| PTPRR         | -1.20580984 | 0.000712745 |
| CNIH3         | -1.20429308 | 0.019277258 |
| CBLN2         | -1.19541634 | 0.024641462 |
| GRIP2         | -1.19485505 | 4.09E-05    |
| TGFB2         | -1.19266424 | 0.025029895 |
| ZCCHC12       | -1.19165591 | 0.012440962 |
| PTPRT         | -1.19154735 | 0.01147044  |
| PLXNB3        | -1.18917096 | 0.01640914  |

|               |             |             |
|---------------|-------------|-------------|
| RP11-449L23.2 | -1.18453611 | 0.031722112 |
| GABRA1        | -1.18390177 | 0.028544847 |
| DNAH10        | -1.18059073 | 0.025182785 |
| CSMD3         | -1.17754633 | 0.019668238 |
| PRRT4         | -1.17716954 | 0.00954253  |
| RGS11         | -1.17062457 | 0.000733991 |
| PART1         | -1.16599705 | 0.03819006  |
| LINC00277     | -1.16528293 | 0.013293208 |
| CACNA1D       | -1.16213074 | 0.000644946 |
| DLX5          | -1.16139437 | 0.035536552 |
| FAM222A       | -1.1595874  | 0.030011208 |
| BCL6          | -1.15956033 | 0.003656903 |
| CDH6          | -1.15065139 | 0.010297013 |
| SYNM          | -1.14944412 | 0.003112694 |
| GPR17         | -1.14274411 | 0.031733934 |
| COL15A1       | -1.13962118 | 0.004667426 |
| CYP26A1       | -1.1368572  | 0.042761997 |
| RP11-108M9.3  | -1.13585333 | 0.039254064 |
| ANGPT1        | -1.12497518 | 0.025828658 |
| LGR4          | -1.12456371 | 0.030426116 |
| TC2N          | -1.11646345 | 0.036424633 |
| FGF1          | -1.11483867 | 0.041315732 |
| FREM1         | -1.10454394 | 0.030271439 |
| CYGB          | -1.10252841 | 0.029063441 |
| NTN1          | -1.09853822 | 0.032962239 |
| LMO4          | -1.09495078 | 0.023900177 |
| RP11-272L13.3 | -1.09230503 | 0.019496855 |
| STK32B        | -1.09208272 | 0.043585879 |
| GREB1         | -1.09045041 | 0.048499065 |
| MIR137HG      | -1.08680114 | 0.01779328  |
| HR            | -1.08624737 | 0.030639231 |
| CHRM2         | -1.08607741 | 0.030503459 |
| LINC01305     | -1.07963752 | 0.046526097 |
| PLA2R1        | -1.07685542 | 0.035536552 |
| RP11-517P14.7 | -1.07427896 | 0.013835774 |
| ABCA12        | -1.07110173 | 0.038121398 |
| RP11-351J23.2 | -1.06748398 | 0.030271439 |
| LRRTM3        | -1.06156755 | 0.017627886 |
| ZMAT4         | -1.05985104 | 0.017611929 |
| HCRTR2        | -1.05763347 | 0.030579987 |
| PLS3          | -1.0563492  | 0.013468674 |
| PCDH19        | -1.05514921 | 0.035536552 |
| RP11-9G1.3    | -1.04989341 | 0.010345895 |
| FZD4          | -1.04489298 | 0.00509972  |

|               |             |             |
|---------------|-------------|-------------|
| SYN3          | -1.0447323  | 0.027018371 |
| COLGALT2      | -1.04447481 | 0.038121398 |
| KLHL29        | -1.04130448 | 0.012901845 |
| IFIT3         | -1.03847394 | 0.034889917 |
| ITPR3         | -1.03785464 | 0.013293208 |
| LRRC9         | -1.036517   | 0.00746993  |
| MLIP          | -1.03581536 | 0.000605117 |
| RP11-713C5.1  | -1.03488682 | 0.047739216 |
| TMEFF2        | -1.0346771  | 0.031193902 |
| LYPD6B        | -1.03165112 | 0.045362743 |
| ZNF114        | -1.02967851 | 0.007675266 |
| MIR770        | -1.02506056 | 0.031733934 |
| KRT13         | -1.02361414 | 0.048048637 |
| ANXA2         | -1.02313622 | 0.002587916 |
| TCEA3         | -1.0227556  | 0.042761997 |
| RP11-490G2.2  | -1.02009536 | 0.042761997 |
| PPP2R1B       | -1.01433257 | 0.012391233 |
| C2orf72       | -1.01021113 | 0.04938823  |
| OLIG2         | -1.0070065  | 0.038507579 |
| RASGRF2       | -1.00539728 | 0.012325442 |
| ETS2          | -1.00130727 | 0.000520869 |
| PTGES3P2      | 1.002540735 | 0.000382599 |
| PAPPA2        | 1.009824411 | 0.030627497 |
| CHRNA3        | 1.015743977 | 0.017991722 |
| RPL12L3       | 1.027108261 | 0.036862095 |
| CTD-2620I22.7 | 1.076004754 | 0.035536552 |
| SLC7A10       | 1.094301561 | 0.044338822 |
| RP11-932O9.10 | 1.096634206 | 0.031132905 |
| CYP26B1       | 1.120025742 | 0.019668238 |
| SNORD15B      | 1.122684366 | 0.043099727 |
| COX7A1        | 1.133388921 | 0.005680874 |
| KIF25-AS1     | 1.14935424  | 0.026428148 |
| MDFI          | 1.167748363 | 0.004113725 |
| RPS12P26      | 1.263538249 | 0.008882413 |
| LLNLF-158E9.1 | 1.271713817 | 0.003990401 |
| RP5-1024C24.1 | 1.3538704   | 0.000600792 |
| CARTPT        | 1.365887388 | 0.001664042 |
| RP11-677M24.1 | 1.418327114 | 0.002952903 |

Positive Log2 fold value is higher in the anterior cortex.

Negative Log2 fold value is higher in the posterior cortex.



Genes that are differentially expressed  
between anterior and posterior cortex at both  
9 and 12 pcw

| Gene Name     | Gene Type              | 9 PCW       |            | 12 PCW      |            |
|---------------|------------------------|-------------|------------|-------------|------------|
|               |                        | Log 2 fold  | P adjusted | Log 2 fold  | P adjusted |
| CYP26A1       | Protein coding         | <b>3.03</b> | 3.75E-12   | <b>1.14</b> | 0.042762   |
| LAMP5         | Protein coding         | <b>2.49</b> | 2.16E-07   | <b>1.51</b> | 0.002314   |
| AE000661.37   | Processed transcript   | <b>2.29</b> | 6.61E-07   | <b>1.23</b> | 0.025233   |
| LRRTM3        | Protein coding         | <b>2.25</b> | 1.07E-07   | <b>1.06</b> | 0.017628   |
| PIP5K1B       | Protein coding         | <b>1.69</b> | 4.78E-08   | <b>1.37</b> | 0.001322   |
| CYP26B1       | Protein coding         | <b>1.69</b> | 3.67E-05   | <b>1.12</b> | 0.019668   |
| GIPR          | Protein coding         | <b>1.67</b> | 0.007744   | <b>1.8</b>  | 0.0002     |
| CNIH3         | Protein coding         | <b>1.64</b> | 2.68E-05   | <b>1.2</b>  | 0.019277   |
| ARAP2         | Protein coding         | <b>1.61</b> | 0.003659   | <b>1.36</b> | 0.001466   |
| RP11-517P14.7 | Unprocessed pseudogene | <b>1.41</b> | 0.00345    | <b>1.07</b> | 0.013836   |
| LRRC9         | Protein coding         | <b>1.41</b> | 0.008442   | <b>1.04</b> | 0.00747    |
| C11orf63      | Protein coding         | <b>1.35</b> | 0.028916   | <b>1.32</b> | 0.005681   |
| SYNJ2         | Protein coding         | <b>1.24</b> | 0.005558   | <b>1.36</b> | 0.000432   |
| CA8           | Protein coding         | <b>1.2</b>  | 0.016209   | <b>1.75</b> | 0.000125   |
| SYNM          | Protein coding         | <b>1.19</b> | 0.029353   | <b>1.15</b> | 0.003113   |
| NPY5R         | Protein coding         | <b>1.13</b> | 0.033269   | <b>1.53</b> | 0.001127   |
| CHRNA3        | Protein coding         | <b>1.54</b> | 8.82E-06   | <b>1.02</b> | 0.017992   |

**Red** Log2 fold values are higher in anterior

**Blue** log2 fold values are higher in posterior
